# Differential COVID-19 infection rates in children, adults, and elderly: evidence from 38 pre-vaccination national seroprevalence studies

Cathrine Axfors,<sup>1,2\*</sup> Angelo Maria Pezzullo,<sup>1,3\*</sup> Despina G. Contopoulos-Ioannidis,<sup>1,4</sup> Alexandre Apostolatos,<sup>1,5</sup> John P.A. Ioannidis<sup>1,6</sup>

*\*equal first author contribution*

<sup>1</sup>Meta-Research Innovation Center at Stanford (METRICS), Stanford University, Stanford, California, USA

<sup>2</sup>Dept for Women's and Children's Health, Uppsala University, Uppsala, Sweden

<sup>3</sup>Section of Hygiene, Department of Life Sciences and Public Health, Università Cattolica del Sacro Cuore, Rome, Italy

<sup>4</sup>Division of Infectious Diseases, Department of Pediatrics, Stanford University School of Medicine, Stanford, California, USA

<sup>5</sup>Faculty of Medicine, Université de Montréal, Montreal, Canada

<sup>6</sup>Departments of Medicine, of Epidemiology and Population Health, of Biomedical Data Science, and of Statistics, Stanford University, Stanford, California, USA

Funding: The work of John Ioannidis is supported by an unrestricted gift by Sue and Bob O'Donnell.

The work of Angelo Maria Pezzullo in this research has been supported by the European Network Staff Exchange for Integrating Precision Health in the Healthcare Systems project (Marie Skłodowska-Curie Research and Innovation Staff Exchange no. 823995). Cathrine Axfors has received funding outside this work from the Knut and Alice Wallenberg Foundation's Postdoctoral

Fellowship (KAW 2019.0561) and postdoctoral grants from Uppsala University (E o R Börjesons stiftelse; Medicinska fakultetens i Uppsala stiftelse för psykiatrisk och neurologisk forskning), The Sweden-America Foundation, Foundation Blanceflor, Swedish Society of Medicine, and Märta och Nicke Nasvells fond. The funders had no role in the design and conduct of the study; collection, management, analysis, and interpretation of the data; preparation, review, or approval of the manuscript; or decision to submit the manuscript for publication.

Conflicts of interest: None

Ethical approval: not applicable

Data sharing statement: All data are in the manuscript and supplementary files.

Correspondence: John P.A. Ioannidis, MD, DSc, SPRC, MSOB X306, 1265 Welch Rd, Stanford, CA 94305. Tel: 650-7045584. E-mail: [jioannid@stanford.edu](mailto:jioannid@stanford.edu)

Running title: Differential COVID-19 infection rates in age groups

Contributions: J.P.A.I. had the original idea. J.P.A.I. and C.A. designed the study with contributions from A.M.P. and D.G.C.-I. All authors edited the protocol. All authors collected data. J.P.A.I., A.M.P. and D.G.C.-I. performed analyses and all authors interpreted the results. J.P.A.I. wrote the first draft and all authors edited it for content. All authors approved the final version.

40-word summary: 38 COVID-19 nationally representative seroprevalence studies conducted before vaccination campaigns were systematically identified. Median seroprevalence ratio in elderly versus non-elderly adults was 0.90-0.95, indicating no generally achieved precision shielding of elderly. In 5 studies, substantial protection (ratio <0.40) was observed.

Text: 2999 words; abstract 249 words; 2 figures; 2 tables; 29 references; 3 supplementary tables and supplementary references.

## ABSTRACT

**Background:** COVID-19 exhibits a steep age gradient of infection fatality rate. There has been debate about whether extra protection of elderly and other vulnerable individuals (precision shielding) is feasible, and, if so, to what extent.

**Methods:** We used systematically retrieved data from national seroprevalence studies conducted in the pre-vaccination era. Studies were identified through SeroTracker and PubMed searches (last update May 17, 2022). Studies were eligible if they targeted representative general populations without high risk of bias. Seroprevalence estimates were noted for children, non-elderly adults, and elderly adults, using cut-offs of 20, and 60 years (or as close to these ages, if they were not available).

**Results:** Thirty-eight national seroprevalence studies from 36 different countries were included in the analysis. 26/38 also included pediatric populations. 25/38 studies were from high-income countries. The median ratio of seroprevalence in the elderly versus non-elderly adults (or non-elderly in general, if pediatric and adult population data were not offered separately) was 0.90-0.95 in different analyses with large variability across studies. In 5 studies (all of them in high-income countries), there was significant protection of the elderly with ratio  $<0.40$ . The median was 0.83 in high-income countries and 1.02 in other countries. The median ratio of seroprevalence in children versus adults was 0.89 and only one study showed a significant ratio of  $<0.40$ .

**Conclusion:** Precision shielding of elderly community-dwelling populations before the availability of vaccines was feasible in some high-income countries, but most countries failed to achieve any substantial focused protection of this age group.

**Keywords:** COVID-19, seroprevalence, vulnerable, elderly, national, survey

## INTRODUCTION

Coronavirus Disease 2019 (COVID-19) is characterized by a steep age-gradient in risk of serious disease and death<sup>1-3</sup>. Death risk after infection increases ~3-fold per 10-year increment, thus differing >1,000-fold between pediatric and geriatric populations. The total fatalities footprint of a pandemic with such strong risk stratification is expected to depend on how effectively high-risk, vulnerable individuals are protected from infection.<sup>4</sup> This applies regardless of whether other effective interventions are used, such as vaccines. However, it is particularly important for the pre-vaccination period.

The ability to protect more aggressively the elderly and other vulnerable individuals (aka, precision shielding) has been contested<sup>5,6</sup>. For a widely circulating virus, it may be difficult to effectively shield only high-risk individuals. In fact, nursing home residents, a particularly high-risk group of elderly people, were even disproportionately more frequently infected early in the pandemic<sup>7-11</sup>. Infections were massively spread in such facilities, as testified by high death toll and high seroprevalence rates in their populations<sup>9-13</sup>. However, the question of age-stratified precision shielding remains open for community-dwelling populations. It is possible that infection rates varied in different age groups. Perhaps community-dwelling elderly might have been less mobile and less exposed than other adults. Conversely, at the other end of the age pyramid, children and adolescents may have had lower infection rates, given the widely implemented school closures.

Insights on the relative infection rates across age strata can be obtained from seroprevalence studies. Hundreds of such studies have been conducted to-date.<sup>14</sup> However, such surveys are also susceptible to numerous biases.<sup>15</sup> Here, to answer the question of whether age-specific precision shielding was achieved in the pre-vaccination period, we used data from comprehensive, national seroprevalence studies without high risk of bias.

## METHODS

The study was pre-registered as part of a broader ongoing project on COVID-19 seroprevalence and infection fatality (protocol: <https://osf.io/xvupr>). Protocol amendments/clarifications appear in Supplementary Table 1.

### *Search strategy and eligibility criteria*

We identified seroprevalence studies (articles, official reports, or preprints) in the live systematic review SeroTracker<sup>14-16</sup>. We also performed PubMed searches using the string “seroprevalence AND (national OR stratified) AND COVID-19” to identify potentially eligible studies that were recently published and may not have been indexed in SeroTracker yet. The searches were performed initially on February 8, 2022 and upon completion of the data extraction, we updated the searches on May 17, 2022 to examine if any additional studies had become available.

We included studies on SARS-CoV-2 seroprevalence that met the following criteria: sampled any number of participants in a national representative sample; sampling was completed by February 28, 2021; adults ( $\geq 21$  years old) were included, regardless of whether children and/or adolescents were included or not; provided an estimate of seroprevalence for non-elderly people (preferably for  $< 70$  years and/or  $< 60$  years, but any cut-off between 60 and 70 years was acceptable); and explicitly aimed to generate samples reflecting the general population at a national level, excluding studies focusing on patient cohorts (such as residual clinical samples), blood donors, workers (healthcare or other), and insurance applicants as well as any other study where the examined population might have had lower or higher risk than the general population. While studies of blood donors, residual clinical samples and non-healthcare workers usually tend to give on average seroprevalence estimates similar to those of explicitly sampled general populations<sup>15</sup>, their results may occasionally be more biased and the representation and bias may be particularly affected in the elderly strata. In

SeroTracker, only studies in the categories of “Household and community samples” and “Multiple general populations” without high risk of bias (reported by the SeroTracker team using the Joanna Briggs Institute Critical Appraisal Tool for Prevalence Studies) were considered for further scrutiny. Similar criteria were applied to any additional PubMed-retrieved studies. Furthermore, similar to previous work<sup>17</sup>, for studies done in the USA, only those that have adjusted the seroprevalence estimates for race/ethnicity were retained, since this factor is known to associate strongly with the risk of SARS-CoV-2 infection<sup>18</sup>.

For studies with several sampled (sub)regions of a country, we accepted those where the sampling locations were dispersed across the country so as to form a reasonable representation of the entire country. We excluded studies where the sampling locations were potentially biased towards higher or lower seroprevalence than the general population. For example, studies were excluded when only urban populations or when only rural populations were sampled; or when locations were selected because they were hard hit (e.g. had many deaths or many cases) or were lightly hit (e.g. had no detected cases or fewer than average detected cases). Conversely, studies composed of regional units were eligible if they included both high and low risk sampling units, aiming for a total sample that is fairly representative of the national general population.

We excluded seroprevalence studies where crude overall seroprevalence in the population was less than 1- test specificity and/or the 95% confidence interval of the seroprevalence went to 0%, since the uncertainty on seroprevalence for them is very large.

We also excluded studies that included in their sampling only pediatric populations without any adults 21 years or older. Studies that used in their sampling a lower age boundary that excluded children and/or adolescents and/or some young adults (e.g. >5, or >18, or >25 years) were included. Studies were included regardless of whether any upper age boundary was used in their sampling.

To avoid any substantive impact of vaccination, we only considered seroprevalence studies where the sampling had been completed by the end of February 2021 and at least 90% of the samples had been collected before end of January 2021.

### ***Extracted information***

Data extraction for eligible articles was performed in duplicate by two authors independently and disagreements were discussed. In cases of persistent disagreements, a third author (JPAI) was the arbitrator.

We extracted from all eligible seroprevalence studies their information on country, dates of sample collection, overall sample size (number tested) and sample size in pediatric, non-elderly adults, and elderly populations, and types of antibody measured (immunoglobulin G (IgG), IgM, IgA). We also extracted the estimated unadjusted seroprevalence (positive samples divided by all samples tested), and the most fully adjusted seroprevalence in children, non-elderly adults, and elderly. We also noted the factors that the authors considered for adjustment in the most fully adjusted calculations. Whenever there were multiple different time points when seroprevalence was assessed in a given study, we selected the time point that gives the highest overall seroprevalence estimate and when there was a tie, we chose the earliest time point.

The groups of children (including adolescents), non-elderly adults, and elderly were defined according to preferred age cut-offs of 20 years and 60 years, therefore ideally these groups referred to 0-20 years, 21-60 years, and >60 years, respectively. For separating pediatric and non-elderly adult populations, we accepted cut-offs in the range 14-20, preferring the one available that was closest to 20. For separating non-elderly adults from elderly, we accepted cut-offs in the range of 54-70, preferring the one available that was closest to 60. Available seroprevalence data on more granular age strata were merged within the three main age groups.



## *Data synthesis*

We calculated for each eligible study, ratios of seroprevalence across children/adolescents, non-elderly adults, and elderly adults. The main analysis focused on the ratio of seroprevalence in the elderly versus non-elderly (non-elderly adults or any non-elderly, if pediatric and adult population data were not offered separately). In sensitivity analyses, we examined the ratios of seroprevalence in the elderly versus any non-elderly, and elderly versus strictly non-elderly adults. These ratios are “shielding ratios”<sup>4</sup> and allow to evaluate whether elderly individuals (a high-risk group) were more protected (and if so, by how much) and if there were consistent patterns across different countries. The observed ratios thus provide estimates of the extent of precision shielding achieved in different countries<sup>4</sup> under the assumption that selection biases in sampling, test performance, and seroreversion are not substantially different in different age strata. Calculations were performed using the crude numbers (tested positive/total tested) in each age stratum; when these were not available, we used the adjusted seroprevalence estimates and converted the adjusted proportion to an equivalent number of seropositives. When both crude numbers and adjusted estimates were available, we examined whether the latter changed the results.

In secondary analysis, we examined the ratio of seroprevalence in children/adolescents versus non-elderly adults – to evaluate whether there was preferential shielding of pediatric populations.

We had anticipated that substantial heterogeneity may exist across countries to preclude formal data synthesis by meta-analysis. Therefore, we express results by using medians and also by describing studies with extreme values. We also formally estimated the between-study heterogeneity of these ratios using the  $I^2$  statistic<sup>19</sup>. In exploratory analyses, we evaluated whether results differed in high-income countries versus other countries (assuming that perhaps focused protection might be more feasible in the former).

## **RESULTS**

### **Eligible studies**

On February 8, 2022, SeroTracker had 547 entries of seroprevalence estimates which were described as national. After in-depth screening (Figure 1; excluded studies in Supplementary Table 2), 38 eligible studies were included in the analyses: 36 had separate seroprevalence data on an elderly age stratum, while the other two (Afghanistan, Oman) could only separate pediatric versus adult population seroprevalence.

### **Study characteristics**

Table 1 presents the 38 eligible studies. They came from 36 different countries (France and USA had two eligible studies each). More than half of the studies were performed in Europe (n=20), 13 were performed in Asia, 4 in the Americas and 1 in Africa. 25 of the 38 studies came from high income countries. Sample sizes varied substantially but tended to be higher in high-income countries. 24/38 studies had a total sample exceeding 5000, but this applied to only 6/13 studies from non-high income countries. 26/38 studies provided separate data for a pediatric population with cut-off ages varying between 14 and 19 years, and 36/38 provided separate data for an elderly population with cut-offs varying between 54 and 70 years. 11 studies assessed all antibodies, 7 assessed IgG and IgM, and 20 assessed only IgG. 20/38 studies performed all their sampling before or up to October 2020.

### **Seroprevalence in the different age groups**

Table 2 shows the seroprevalence estimates for the pre-specified groups of children, non-elderly adults, non-elderly, and elderly. There was a wide range of values from 0% in Faroe Islands to over 40% in the Czech Republic. Whenever available, adjusted seroprevalence estimates tended to

be similar to unadjusted estimates with few exceptions (Table 2). Parameters used for adjustments are shown in Supplementary Table 3.

### **Ratio of seroprevalence in different age groups**

Figure 2 shows the ratio of seroprevalence in the elderly versus the seroprevalence in non-elderly (non-elderly adults or non-elderly in general, if pediatric and adult population data were not offered separately). As shown (and as anticipated) there was large between-study variability with  $I^2=98\%$ .

The median ratio was 0.95 (0.90 if adjusted seroprevalence estimates were given priority in the calculations), suggesting a slightly lower seroprevalence in elderly populations and 23/36 studies had point estimates in this direction. For the two countries with two studies each, the point estimates were in the same direction, but the magnitude of the estimated protection of the elderly varied. Twelve studies with suggested protection of elderly and 6 studies with suggested inverse protection (higher seroprevalence in the elderly) had 95% confidence intervals excluding a ratio of 1.00. Canada, Slovenia, one of the two studies in France and (in adjusted analyses only) Germany and one of the USA studies suggested protection over 2.5-fold (ratio  $<0.40$ ) with 95% confidence intervals excluding 1.00. Inverse protection of such magnitude (ratio  $>2.5$ ) with 95% confidence intervals excluding 1.00 was not seen in any study.

Sensitivity analyses gave similar results: the median ratio of seroprevalence in the elderly versus any non-elderly was 0.95 with 20/36 studies offering point estimates in the direction of some protection of the elderly; the median ratio of seroprevalence in the elderly versus strictly non-elderly adults was 0.98 with 14/24 studies offering point estimates in the direction of some protection in the elderly.

In the comparison of pediatric populations versus non-elderly adults (Figure 3), there was again large between-study heterogeneity ( $I^2=96\%$ ). The median ratio of seroprevalence was 0.89 and 15/26 studies presented point estimates in the direction of greater protection of children/adolescents than non-elderly adults. 15 studies had 95% confidence intervals excluding a ratio of 1.00 (with lower seroprevalence in the pediatric populations in 8 and higher in 7). Only one study (Maldives) showed a ratio of  $<0.40$  with 95% confidence intervals excluding 1.00 and none had a ratio  $>2.5$  with 95% confidence intervals excluding 1.00.

### **High income versus non-high income countries**

For the main analysis of elderly versus non-elderly (non-elderly adults or non-elderly in general, if pediatric and adult population data were not offered separately), the median ratio was 0.85 in 25 studies done in high-income countries (0.83 if priority were given to adjusted estimates) and 1.02 in 11 studies done in non-high income countries. All 5 statistically significant estimates of  $>2.5$ -fold protection of the elderly were in high income countries. For a more modest protection threshold, all 9 estimates of  $>1.5$ -fold protection of the elderly (ratio  $<0.67$ ) with 95% confidence intervals excluding 1.00 were in high income countries, and both of the 2 estimates of  $>1.5$ -fold inverse protection (higher seroprevalence in the elderly) with 95% confidence intervals excluding 1.00 were in non-high income countries.

## **DISCUSSION**

Our analysis of data from 38 national seroprevalence studies for COVID-19 showed that before the advent of massive vaccination there was large heterogeneity across countries on the extent to which elderly people in the community were protected or not from infection compared with younger populations. On average, there was very little extra shielding of the elderly. However, several countries apparently did achieve substantial precision shielding of this vulnerable group.

Conversely, in a few countries elderly were apparently infected even modestly more frequently than non-elderly adults. Conclusive evidence for substantial preferential protection of the elderly in the community was seen only in some high income countries. In non-high income countries, the average ratio of seroprevalence between age groups suggested no preferential protection by age. There was also little difference in seroprevalence in children versus non-elderly adults overall, but the pattern differed across countries. On average, children were slightly less frequently infected than non-elderly adults.

These data suggest that precision shielding of vulnerable elderly populations is feasible, but strong shielding of the community-dwelling elderly populations was uncommon during the COVID-19 pandemic. It is unclear if this failure reflects practical difficulties of achieving major precision shielding, especially in disadvantaged settings<sup>20,21</sup>, or the fact that pandemic response policies may not have focused much on this aspect, instead aiming for more horizontal measures. Country-level responses may have differed in this regard, and even within countries heterogeneity may have existed across states and local communities. Given that a large share of COVID-19 deaths among community-dwelling people happen in the elderly, protection shielding exceeding 2.5-fold, as documented for 5 countries in our analysis, reflects roughly halving the total COVID-19 deaths among community-dwelling populations. Therefore, the benefit can be very large. Unfortunately, however, the countries that apparently did achieve some substantial shielding of their community-dwelling elderly, failed in protecting resident of long-term care facilities<sup>7-13</sup>, where infection fatality rates can be much higher (even 10-fold higher) than in community-dwelling elderly<sup>17</sup>. This resulted in numerous deaths of elderly residents in countries like USA, Canada, France, Germany, and Slovenia. Seroprevalence studies have documented extremely high rates of infection in nursing homes, much higher than in the community, in diverse countries, especially during 2020<sup>9-13</sup>.

Some caveats are worth discussing. First, while we used stringent criteria to select least biased studies, bias may still exist. Participants in serosurveys may differ from non-participants in infection risk.<sup>15</sup> However, here this would be a problem only if the selection bias varied in different age groups.

Second, the probability of seroconversion after infection and the rapidity of seroreversion may vary depending on age.<sup>22,23</sup> If anything, old age (and more symptomatic disease) tend to be associated with longer persistence of antibodies.<sup>22</sup> If so, the precision shielding of elderly may have been slightly larger than what we calculate. Given that most studies evaluated here were done early in the pandemic, seroreversion was probably not large.

Third, for some studies, seroprevalence rates were very low and 95% CIs very wide. Depending on what adjustments are made, seroprevalence ratios might also differ in such cases, although in most studies we saw similar results for adjusted and unadjusted calculations.

Fourth, the counterfactual seroprevalence ratios in the absence of any restrictive measures are unknown. Evidence from influenza seroprevalence assessments suggests that often children and/or young adults may be infected more frequently than elderly individuals, perhaps due to greater mobility and exposures, but this is not absolute and may vary per year and location<sup>24-27</sup>. Extrapolations to SARS-CoV-2 are tenuous.

Finally, focused protection may have varied in subsequent phases of the pandemic with infection rate ratios across age groups. Vaccine availability in 2021 was typically prioritized for the elderly leading to shifts in the age distribution of COVID-19 impact.<sup>28</sup> Vaccination also allowed more mobility and higher population exposure. After the Delta and Omicron waves, the vast majority of people were infected at least once in most countries.<sup>29</sup> Even if precision shielding of the elderly can be achieved (as our data suggest), it is unknown whether it can be maintained effectively for

pandemic-long circles lasting 2 or more years. Moreover, adverse consequences of trying to diminish exposures of vulnerable elderly may be substantial for their social well-being and their mental health<sup>30,31</sup>. Adverse consequences are likely for all age groups, including for children after school closures<sup>32</sup>.

Acknowledging these caveats, our analysis indicates that precision shielding was feasible in several high-income countries in the first year of the pandemic. However, most countries had no major differences in infection rates across age groups. Precision shielding or lack thereof may have substantially affected the eventual death toll and excess deaths<sup>33</sup>. These observations may be useful for future pandemic preparedness, especially for pathogens exhibiting large fatality rate variability across different population groups.

## REFERENCES

1. Ioannidis JPA, Axfors C, Contopoulos-Ioannidis DG. Population-level COVID-19 mortality risk for non-elderly individuals overall and for non-elderly individuals without underlying diseases in pandemic epicenters. *Environ Res.* 2020;188:109890.
2. O'Driscoll M, Dos Santos GR, Wang L, Cummings DAT, Azman AS, Paireau J, et al. Age-specific mortality and immunity patterns of SARS-CoV-2. *Nature.* 2021;590:140-145.
3. Williamson EJ, Walker AJ, Bhaskaran K, Bacon S, Bates C, Morton CE, Curtis HJ, Mehrkar A, Evans D, Inglesby P, Cockburn J, McDonald HI, MacKenna B, Tomlinson L, Douglas IJ, Rentsch CT, Mathur R, Wong AYS, Grieve R, Harrison D, Forbes H, Schultze A, Croker R, Parry J, Hester F, Harper S, Perera R, Evans SJW, Smeeth L, Goldacre B. Factors associated with COVID-19-related death using OpenSAFELY. *Nature.* 2020 Aug;584(7821):430-436.
4. Ioannidis JPA. Precision shielding for COVID-19: metrics of assessment and feasibility of deployment. *BMJ Glob Health.* 2021 Jan;6(1):e004614.
5. Lenzer J. Covid-19: Experts debate merits of lockdowns versus "focused protection". *BMJ.* 2020 Nov 3;371:m4263.
6. Lenzer J. Covid-19: Group of UK and US experts argues for "focused protection" instead of lockdowns. *BMJ.* 2020 Oct 7;371:m3908.
7. Levin AT, Jylhävä J, Religa D, Shallcross L. COVID-19 prevalence and mortality in longer-term care facilities. *Eur J Epidemiol.* 2022 Mar;37(3):227-234.
8. Comas-Herrera A, Zalakaín J, Lemmon E, Henderson D, Litwin C, Hsu A, et al. Mortality associated with COVID-19 in care homes: international evidence. Article in LTCcovid.org, International Long-Term Care Policy Network, CPEC-LSE, 14 October2020.



9. Verschoor CP, Bowdish DME. Estimating SARS-CoV-2 seroprevalence in long-term care: a window of opportunity. *Lancet Healthy Longev.* 2022 Jan;3(1):e2-e3.
10. Friedman SM, Davidow AL, Gurumurthy M, Peymani R, Webb J, Desai K, Siderits R, Nepomich A, Lifshitz E, Thomas PA. Antibody Seroprevalence, Infection and Surveillance for SARS-CoV-2 in Residents and Staff of New Jersey Long-Term Care Facilities. *J Community Health.* 2022 Jun 15:1–9.
11. Krutikov M, Stirrup O, Nacer-Laidi H, Azmi B, Fuller C, Tut G, Palmer T, Shrotri M, Irwin-Singer A, Baynton V, Hayward A, Moss P, Copas A, Shallcross L; COVID-19 Genomics UK consortium. Outcomes of SARS-CoV-2 omicron infection in residents of long-term care facilities in England (VIVALDI): a prospective, cohort study. *Lancet Healthy Longev.* 2022 May;3(5):e347-e355.
12. Candel FJ, Barreiro P, San Román J, et al. The demography and characteristics of SARS-CoV-2 seropositive residents and staff of nursing homes for older adults in the Community of Madrid: the SeroSOS study. *Age Ageing.* 2021;50(4):1038–47.
13. Chudasama DY, Milbourn H, Nsonwu O, et al. Penetration and impact of COVID-19 in long term care facilities in England: population surveillance study. *Int J Epidemiol.* 2021;50(6):1804–13.
14. Arora RK, Joseph A, Van Wyk J, Rocco S, Atmaja A, May E, et al. SeroTracker: a global SARS-CoV-2 seroprevalence dashboard. *Lancet Infect Dis.* 2020:S1473-3099(20)30631-9.
15. Ioannidis JPA. Reconciling estimates of global spread and infection fatality rates of COVID-19: An overview of systematic evaluations. *Eur J Clin Invest.* 2021;51(5):e13554.
16. SeroTracker, in: <https://serotracker.com/en/Explore>, last accessed May 17, 2022.

17. Axfors C, Ioannidis JPA. Infection fatality rate of COVID-19 in community-dwelling elderly populations. *Eur J Epidemiol*. 2022 Mar;37(3):235-249.
18. Holden TM, Simon MA, Arnold DT, Halloway V, Gerardin J. Structural racism and COVID-19 response: higher risk of exposure drives disparate COVID-19 deaths among Black and Hispanic/Latinx residents of Illinois, USA. *BMC Public Health*. 2022 Feb 15;22(1):312.
19. Ioannidis JP, Patsopoulos NA, Evangelou E. Uncertainty in heterogeneity estimates in meta-analyses.. *BMJ*. 2007 Nov 3;335(7626):914-6.
20. Rocha R, Atun R, Massuda A, Rache B, Spinola P, Nunes L, Lago M, Castro MC. Effect of socioeconomic inequalities and vulnerabilities on health-system preparedness and response to COVID-19 in Brazil: a comprehensive analysis. *Lancet Glob Health*. 2021 Jun;9(6):e782-e792.
21. Barron GC, Laryea-Adjei G, Vike-Freiberga V, Abubakar I, Dakkak H, Devakumar D, Johnsson A, Karabey S, Labonté R, Legido-Quigley H, Lloyd-Sherlock P, Olufadewa II, Ray HC, Redlener I, Redlener K, Serageldin I, Lima NT, Viana V, Zappone K, Huynh UK, Schlosberg N, Sun H, Karadag O. Safeguarding people living in vulnerable conditions in the COVID-19 era through universal health coverage and social protection. *Lancet Public Health*. 2022 Jan;7(1):e86-e92.
22. Peghin M, De Martino M, Fabris M, Palese A, Visintini E, Graziano E, Gerussi V, Bontempo G, D'Aurizio F, Biasotto A, Sartor A, Pipan C, Marzinotto S, Curcio F, Bouza E, Isola M, Tascini C. The fall in antibody response to SARS-CoV-2: a longitudinal study of asymptomatic to critically ill patients up to 10 months after Recovery. *J Clin Microbiol*. 2021 Oct 19;59(11):e0113821.

23. Bailie CR, Tseng YY, Carolan L, et al. Trend in sensitivity of SARS-CoV-2 serology one year after mild and asymptomatic COVID-19: unpacking potential bias in seroprevalence studies. *Clin Infect Dis*. 2022 Jan 13:ciac020.
24. Gomaa MR, Badra R, El Rifay AS, Kandeil A, Kamel MN, Abo Shama NM, El-Shesheny R, Barakat AB, Ali MA, Kayali G. Incidence and seroprevalence of seasonal influenza A viruses in Egypt: Results of a community-based cohort study. *Influenza Other Respir Viruses*. 2022 Jul;16(4):749-755.
25. Vinh DN, Nhat NTD, de Bruin E, Vy NHT, Thao TTN, Phuong HT, Anh PH, Todd S, Quan TM, Thanh NTL, Lien NTN, Ha NTH, Hong TTK, Thai PQ, Choisy M, Nguyen TD, Simmons CP, Thwaites GE, Clapham HE, Chau NVV, Koopmans M, Boni MF. Age-seroprevalence curves for the multi-strain structure of influenza A virus. *Nat Commun*. 2021 Nov 18;12(1):6680.
26. Wu JT, Leung K, Perera RA, Chu DK, Lee CK, Hung IF, Lin CK, Lo SV, Lau YL, Leung GM, Cowling BJ, Peiris JS. Inferring influenza infection attack rate from seroprevalence data. *PLoS Pathog*. 2014 Apr 3;10(4):e1004054.
27. Hopkins RS, Kite-Powell A, Goodin K, Hamilton JJ. The ratio of emergency department visits for ILI to seroprevalence of 2009 pandemic influenza A (H1N1) virus infection, Florida, 2009. *PLoS Curr*. 2014 Jun 30; 6: ecurrents.outbreaks.44157f8d90cf9f8fafa04570e3a00cab.
28. Pastorino R, Pezzullo AM, Villani L, Causio FA, Axfors C, Contopoulos-Ioannidis DG, Boccia S, Ioannidis JPA. Change in age distribution of COVID-19 deaths with the introduction of COVID-19 vaccination. *Environ Res*. 2022 Mar;204(Pt C):112342.

29. Ioannidis JPA. The end of the COVID-19 pandemic. *Eur J Clin Invest.* 2022 Jun;52(6):e13782.
30. Dove A, Guo J, Calderón-Larrañaga A, Vetrano DL, Fratiglioni L, Xu W. Association between social isolation and reduced mental well-being in Swedish older adults during the first wave of the COVID-19 pandemic: the role of cardiometabolic diseases. *Aging (Albany NY).* 2022 Mar 16;14(6):2462-2474.
31. Bankole A. Impact of Coronavirus Disease 2019 on geriatric psychiatry. *Psychiatr Clin North Am.* 2022 Mar;45(1):147-159.
32. Viner R, Russell S, Saullé R, Croker H, Stansfield C, Packer J, Nicholls D, Goddings AL, Bonell C, Hudson L, Hope S, Ward J, Schwalbe N, Morgan A, Minozzi S. School Closures During Social Lockdown and Mental Health, Health Behaviors, and Well-being Among Children and Adolescents During the First COVID-19 Wave: A Systematic Review. *JAMA Pediatr.* 2022 Apr 1;176(4):400-409.
33. Levitt M, Zonta F, Ioannidis JP. Comparison of pandemic excess mortality in 2020-2021 across different empirical calculations. *Environ Res.* 2022 (in press).

**Table 1.** Eligible studies: population and sampling details

| Country             | Children | Non-elderly adults | Elderly | Non-elderly | Age cut-off, pediatric | Age cut-off, elderly | Antibodies | Sampling time      |
|---------------------|----------|--------------------|---------|-------------|------------------------|----------------------|------------|--------------------|
| Afghanistan         | 4346     | 5168               |         | 9514        | 17                     | NA                   | IgG, IgM   | June 2020          |
| Andorra             | 10590    | 38765              | 10331   | 49355       | 19                     | 59                   | IgG, IgM   | May 2020           |
| Canada              |          |                    | 1029    | 5789        | NA                     | 59                   | IgG only   | May-Sept 2020      |
| Czech Republic      |          |                    | 1215    | 5665        | NA                     | 59                   | IgG only   | Dec 2020 -Jan 2021 |
| Denmark*            | 1126     | 13500              | 3540    | 14626       | 17                     | 64                   | All        | Sept-Dec 2020      |
| England             |          |                    | 21953   | 77955       | NA                     | 64                   | IgG only   | June-July 2020     |
| Faroe Islands       | 14616    | 25851              | 12387   | 40467       | 19                     | 59                   | All        | November 2020      |
| France (Warszawski) | 1438     | 47555              | 14531   | 48993       | 17                     | 64                   | IgG only   | November 2020      |
| France (Carrat)     |          |                    | 41933   | 40193       | NA                     | 59                   | IgG only   | May-Sept 2020      |
| Germany             |          |                    | 3819    | 11302       | NA                     | 64                   | IgG only   | Oct 2020-Feb 2021  |
| Hungary             |          |                    | 2386    | 8088        | NA                     | 64                   | IgG only   | May 2020           |
| Iceland*            |          |                    | 3400    | 27176       | NA                     | 70                   | All        | April-June 2020    |
| India               | 2290     | 23271              | 3037    | 25561       | 17                     | 60                   | IgG only   | Dec 2020-Jan 2021  |
| Iran                | 2302     | 7596               | 1358    | 9898        | 17                     | 59                   | IgG only   | August-Oct 2020    |
| Ireland             | 198      | 1224               | 311     | 1422        | 19                     | 59                   | IgG only   | June-July 2020     |
| Israel              | 5864     | 32809              | 15687   | 38673       | 19                     | 59                   | IgG only   | June-Sept 2020     |
| Italy*              | 2788     | 21434              | 12176   | 24222       | 17                     | 59                   | IgG only   | May-July 2020      |
| Japan               |          |                    | 2794    | 5156        | NA                     | 59                   | All        | June 2020          |
| Jersey              |          |                    | 298     | 1077        | NA                     | 64                   | IgG, IgM   | June 2020          |
| Jordan              | 1486     | 3027               | 470     | 5513        | 19                     | 59                   | IgG, IgM   | Dec 2020-Jan 2021  |

|              |      |       |       |       |    |    |          |                   |
|--------------|------|-------|-------|-------|----|----|----------|-------------------|
| Lao PDR      | 233  | 1849  | 351   | 2082  | 18 | 60 | IgG, IgM | August-Sept 2020  |
| Lebanon      | 293  | 1449  | 200   | 1742  | 19 | 59 | IgG only | Dec 2020-Jan 2021 |
| Lithuania    |      |       | 2218  | 868   | NA | 64 | IgG, IgM | October 2020      |
| Maldives     | 410  | 1396  | 83    | 1806  | 17 | 59 | IgG only | October-Nov 2020  |
| Mexico*      | 1891 | 5785  | 1787  | 7676  | 19 | 59 | All      | August-Nov 2020   |
| Mongolia     | 1898 | 2784  | 317   | 4682  | 19 | 59 | IgG only | October-Dec 2020  |
| Nepal        | 455  | 2275  | 310   | 2730  | 14 | 64 | All      | October 2020      |
| Netherlands  | 1128 | 3472  | 2213  | 4600  | 19 | 59 | IgG only | June-August 2020  |
| Norway       | 868  | 21396 | 5436  | 22264 | 19 | 66 | IgG only | Nov 2020-Feb 2021 |
| Oman         | 57   | 4007  |       | 4064  | 14 | NA | IgG only | November 2020     |
| Pakistan     | 1995 | 2030  | 975   | 4022  | 19 | 59 | IgG, IgM | October-Nov 2020  |
| Portugal     | 2108 | 6495  | 4795  | 8603  | 17 | 54 | All      | Sept-Oct 2020     |
| Russia       | 9705 | 44921 | 19432 | 54626 | 17 | 59 | IgG only | June-July 2020    |
| Senegal      | 462  | 867   | 117   | 1329  | 15 | 60 | All      | Oct-Nov 2020      |
| Slovenia*    | 174  | 673   | 364   | 847   | 20 | 60 | All      | Oct-Nov 2020      |
| Spain        | 8636 | 27453 | 15320 | 36089 | 19 | 59 | IgG only | November 2020     |
| USA          |      |       |       |       |    |    |          |                   |
| (Sullivan)   |      | 3481  | 1173  | 3481  | NA | 64 | All      | August-Dec 2020   |
| USA (Kalish) |      | 6785  | 1273  | 6785  | NA | 69 | All      | April-August 2020 |

NA, not available. \* Detailed notes: Denmark: Numbers are approximated based on number of invited persons and proportion participating. Iceland: Numbers are approximated based on estimated age-stratified national seroprevalence, number of people tested and the population pyramid. Italy: Numbers are approximated based on the proportion positive and the 95% CI in each age group. Mexico: Numbers are approximated from adjusted seroprevalence. Slovenia: October 3 estimates used according to predefined eligibility criteria.

**Table 2.** Seroprevalence estimates (%) for age groups: unadjusted (and adjusted in parenthesis)

| Country             | Seroprevalence<br>in children | Seroprevalence<br>in non-elderly<br>adults | Seroprevalence in<br>non-elderly | Seroprevalence<br>in elderly |
|---------------------|-------------------------------|--------------------------------------------|----------------------------------|------------------------------|
| Afghanistan         | 25.3                          | 35.2                                       | 30.7                             |                              |
| Andorra             | 12.6                          | 11.0                                       | 11.3                             | 13.1                         |
| Canada              |                               |                                            | 2.1                              | 0.7                          |
| Czech Republic      |                               |                                            | 43.7                             | 41.6                         |
| Denmark             | 6.5 (6.5)                     | 4.2 (4.3)                                  | 4.4 (4.5)                        | 2.3 (2.3)                    |
| England             |                               |                                            | 6.1 (6.8)                        | 3.6 (3.2)                    |
| Faroe Islands       | 0.0                           | 0.0                                        | 0.0                              | 0.0                          |
| France (Warszawski) | 8.9 (9.8)                     | 6.7 (6.4)                                  | 6.8 (6.5)                        | 4.2 (4.2)                    |
| France (Carrat)     |                               |                                            | 6.8                              | 2.3                          |
| Germany             |                               |                                            | 1.3 (1.9)                        | 1.1 (0.6)                    |
| Hungary             |                               |                                            | 0.6 (0.7)                        | 0.8 (0.8)                    |
| Iceland             |                               |                                            | 1.0                              | 0.5                          |
| India               | 27.7 (27.0)                   | 25.6 (24.0)                                | 25.7 (24.5)                      | 28.2 (26.0)                  |
| Iran                | (11.5)                        | (12.6)                                     | (12.4)                           | (19.4)                       |
| Ireland             | 1.5 (1.4)                     | 2.0 (1.7)                                  | 1.9 (1.7)                        | 1.9 (1.7)                    |
| Israel              | (7.2)                         | (4.0)                                      | (4.5)                            | (2.2)                        |
| Italy               | 2.2 (2.2)                     | 2.5 (2.5)                                  | 2.5 (2.5)                        | 2.6 (2.6)                    |
| Japan               |                               |                                            | 0.1                              | 0.1                          |
| Jersey              |                               |                                            | 3.8                              | 5.4                          |
| Jordan              | 36.2                          | 33.8                                       | 34.6                             | 34.5                         |
| Lao PDR             | 3.9 (4.2)                     | 4.9 (5.1)                                  | 4.8 (5.0)                        | 8.8 (9.3)                    |

|                |             |             |             |             |
|----------------|-------------|-------------|-------------|-------------|
| Lebanon        | 15.4 (17.8) | 15.9 (18.3) | 15.8 (18.2) | 18.5 (21.4) |
| Lithuania      |             |             | 1.4         | 2.1         |
| Maldives       | 4.9         | 15.2        | 12.8        | 31.3        |
| Mexico         | 22.5 (22.5) | 27.8 (27.9) | 26.5 (25.7) | 18.6 (18.6) |
| Mongolia       | 1.1 (0.8)   | 1.7 (1.3)   | 1.5 (1.1)   | 1.3 (1.2)   |
| Nepal          | (8.8)       | (15.7)      | (14.1)      | (10.7)      |
| Netherlands    | 2.4 (3.7)   | 5.2 (4.9)   | 4.5 (4.2)   | 5.0 (4.9)   |
| Norway         | 1.8 (1.9)   | 0.9 (0.8)   | 0.9 (0.9)   | 0.6 (0.5)   |
| Oman           | (23.5)      | (21.5)      | (21.5)      |             |
| Pakistan       | 4.2         | 8.9         | 6.6         | 8.7         |
| Portugal       | (2.4)       | (2.3)       | (2.3)       | (1.9)       |
| Russia*        | 21.6        | 15.6        | 16.6        | 17.4        |
| Senegal        | 19.3 (19.3) | 31.7 (32.1) | 27.4 (27.4) | 24.8 (25.1) |
| Slovenia*      | 4.9         | 5.6         | 5.5         | 2.1         |
| Spain          | 7.8 (7.6)   | 10.4 (10.5) | 9.8 (9.3)   | 10.4 (10.3) |
| USA (Sullivan) |             | 5.6 (5.5)   | 5.6 (5.5)   | 2.9 (1.9)   |
| USA (Kalish)   |             | 3.8 (4.1)   | 3.8 (4.1)   | 3.6 (3.5)   |

\* Detailed notes: Russia: Median percentage across tested regions. Slovenia: October 3 estimates used according to predefined eligibility criteria. Inverse-variance fixed effects meta-analysis used to combine age sub-strata.



## FIGURE LEGENDS

**Figure 1.** Flow chart for screening and selection of eligible studies. May 2022 search update: Among 3412 identified SeroTracker records, 9 reports were manually assessed for eligibility (after applying relevant SeroTracker filters according to first search), and 7 excluded. Details on the totally 79 reports excluded among 116 reports manually assessed for eligibility are in Supplementary Table 2.

**Figure 2.** Seroprevalence ratio for elderly versus non-elderly (non-elderly adults or non-elderly in general, if pediatric and adult population data were not offered separately). See methods for definition of age groups. The presented 95% confidence intervals are estimated using crude counts in a 2 by 2 table for each study ( $[\text{number elderly positive}/\text{number elderly tested}]/[\text{number non-elderly positive}/\text{number non-elderly tested}]$ ). When only adjusted seroprevalence estimates were available without crude data, these were converted to equivalent of number positive (number positive = adjusted seroprevalence x number tested in the specific age group).

**Figure 3.** Seroprevalence ratio for pediatric populations versus non-elderly adults. See methods for definition of age groups. The presented 95% confidence intervals are estimated using crude counts in a 2 by 2 table for each study ( $[\text{number pediatric population positive}/\text{number pediatric population tested}]/[\text{number non-elderly adults positive}/\text{number non-elderly adults tested}]$ ). When only adjusted seroprevalence estimates were available without crude data, these were converted to equivalent of number positive (number positive = adjusted seroprevalence x number tested in the specific age group).

**Figure 1.** Flow chart for screening and selection of eligible studies.

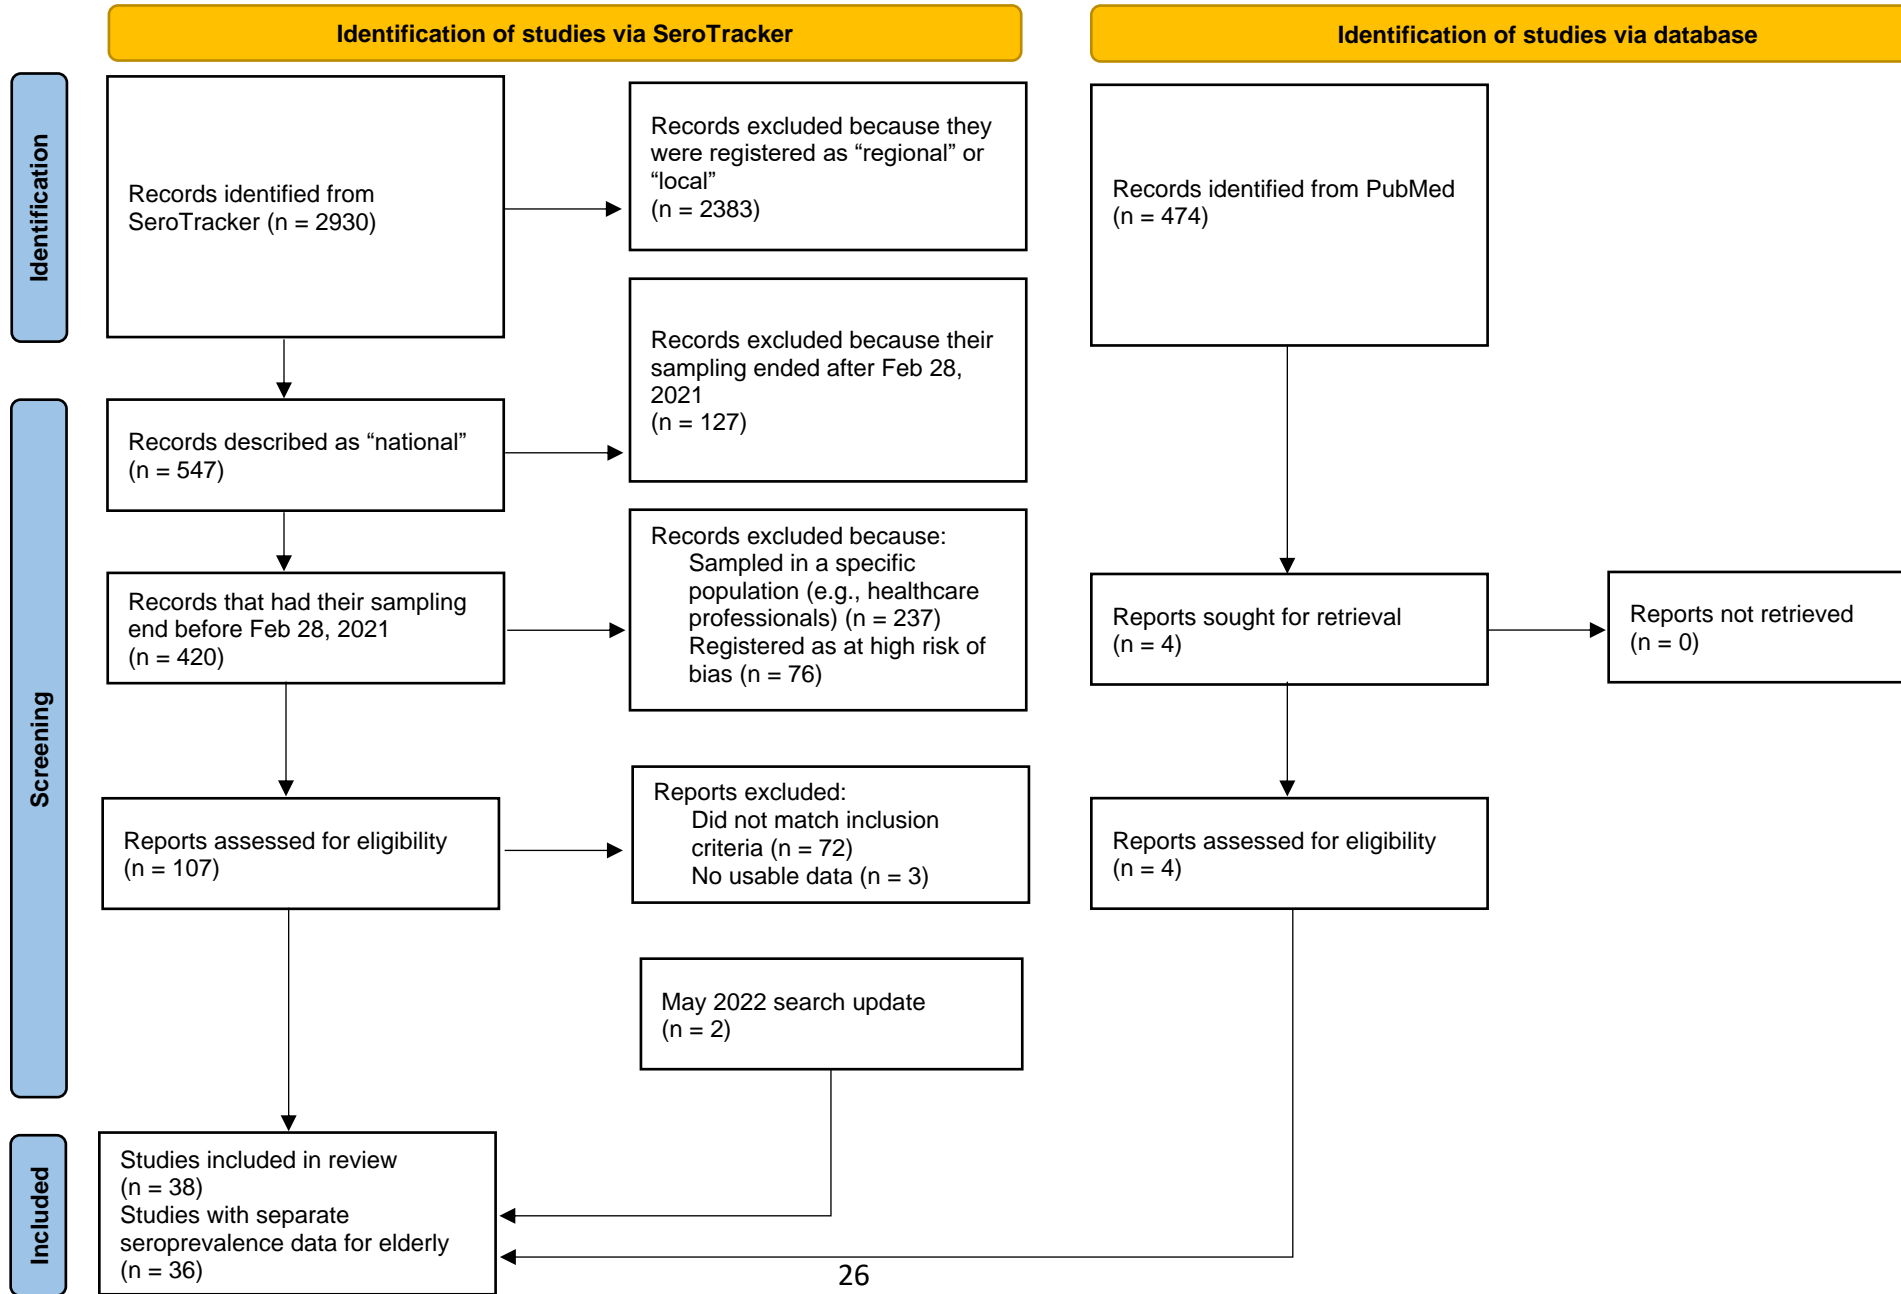

Figure 2.

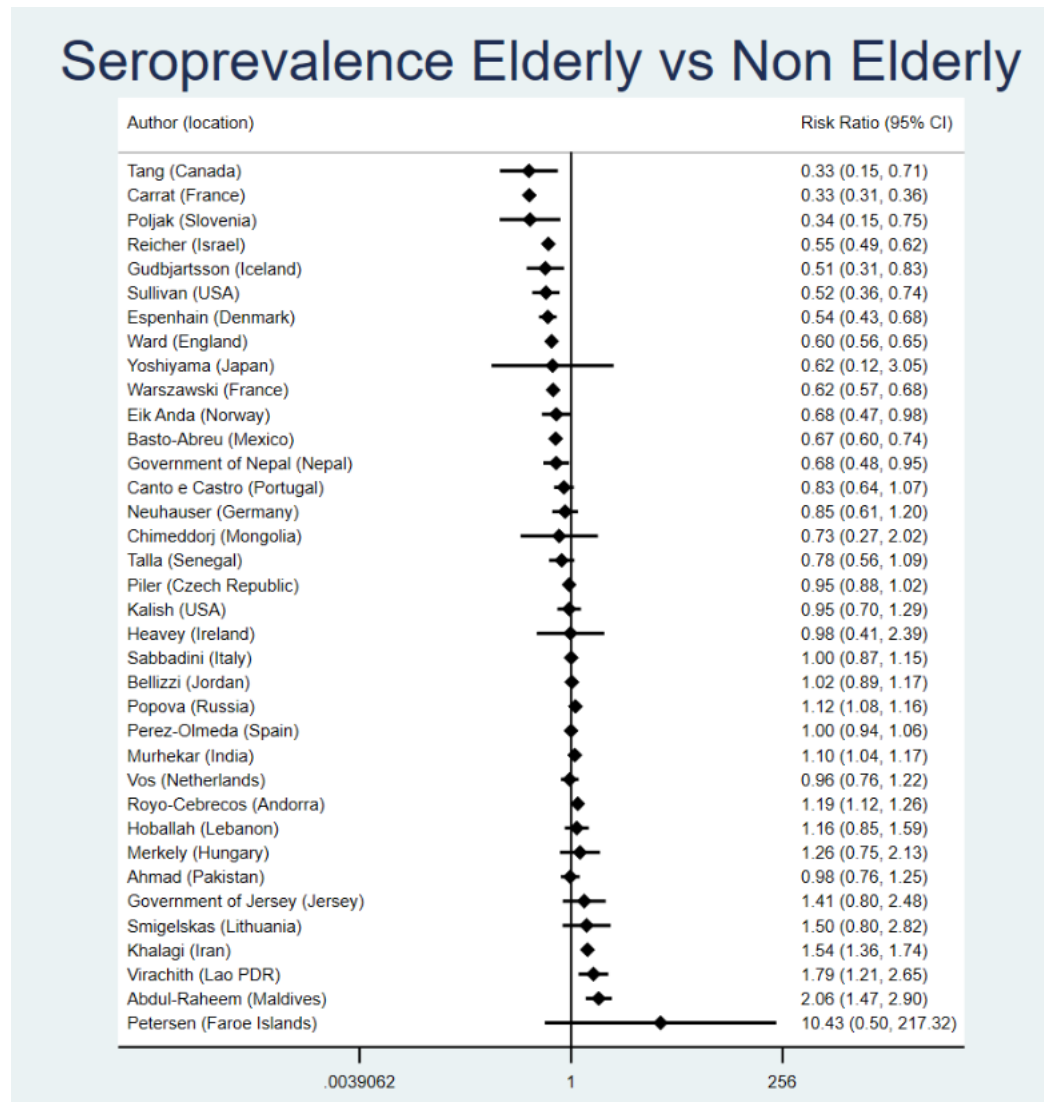

Figure 3.

### Seroprevalence Children/Adolescents vs Non Elderly Adults

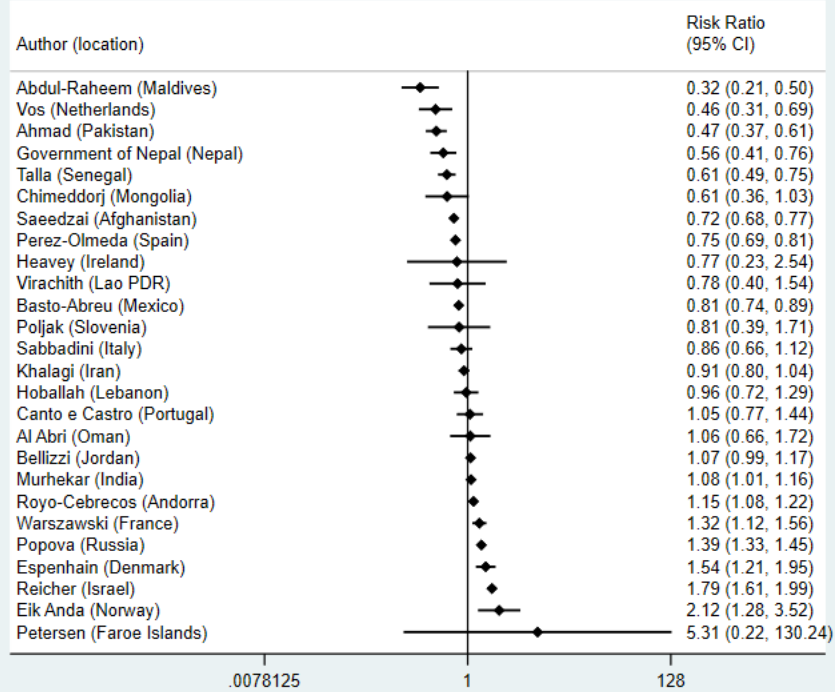

**Supplementary Table 1: Amendments/clarifications to protocol.**

| Manuscript section              | Amendment/Clarification                                                                                                                                                                                                                                                                                                                                                       | Rationale                                                                                                                                                                                                  |
|---------------------------------|-------------------------------------------------------------------------------------------------------------------------------------------------------------------------------------------------------------------------------------------------------------------------------------------------------------------------------------------------------------------------------|------------------------------------------------------------------------------------------------------------------------------------------------------------------------------------------------------------|
| Eligibility for this subproject | For separating pediatric and non-elderly adult populations, we accepted cut-offs in the range 14-20, preferring the one available that was closest to 20. For separating non-elderly adults from elderly, we accepted cut-offs in the range of 54-70, preferring the one available that was closest to 60.                                                                    | Clarification/specification needed for lower acceptable cut-off of pediatric group; for elderly cut-off accepted also one study (Portugal) with cut-off at 54 years (its exclusion gives similar results). |
| Analysis                        | The main analysis focused on the ratio of seroprevalence in the elderly versus non-elderly (non-elderly adults or non-elderly in general, if pediatric and adult population data were not offered separately). In sensitivity analyses, we examined the ratios of seroprevalence in the elderly versus any non-elderly, and elderly versus strictly non-elderly adults.       | Clarification/specification needed                                                                                                                                                                         |
| Analysis                        | Calculations were performed using the crude numbers (tested positive/tested) in each age stratum; when these were not available, we used the adjusted seroprevalence estimates and converted the adjusted proportion to an equivalent number of seropositives. When both crude numbers and adjusted estimates were available, we examined whether the latter changed results. | Clarification/specification needed; analyses were run with both crude and adjusted results and results are similar (as shown in the paper)                                                                 |
| Analysis                        | The presented 95% confidence intervals for seroprevalence ratios are estimated using crude counts in a 2 by 2 table for each study. When only adjusted seroprevalence estimates were available without crude data, these were converted to equivalent of number positive (number positive = adjusted seroprevalence x number tested in the specific age group).               | Clarification/specification needed                                                                                                                                                                         |

**Supplementary Table 2.** Details of excluded studies among reports manually assessed for eligibility (first search: 107 assessed, 72 excluded; search update: 9 assessed, 7 excluded).

| URL/DOI                                                                                                                                                                                     | Country    | Reason for exclusion                                       |
|---------------------------------------------------------------------------------------------------------------------------------------------------------------------------------------------|------------|------------------------------------------------------------|
| <i>First search</i>                                                                                                                                                                         |            |                                                            |
| <a href="https://dx.doi.org/10.1038/s41598-021-92775-y">https://dx.doi.org/10.1038/s41598-021-92775-y</a>                                                                                   | Brazil     | Several sampled (sub)regions not representative of country |
| <a href="https://www.ncbi.nlm.nih.gov/pmc/articles/PMC8225319/">https://www.ncbi.nlm.nih.gov/pmc/articles/PMC8225319/</a>                                                                   | Brazil     | Several sampled (sub)regions not representative of country |
| <a href="https://papers.ssrn.com/sol3/papers.cfm?abstract_id=3762489">https://papers.ssrn.com/sol3/papers.cfm?abstract_id=3762489</a>                                                       | Cabo Verde | Seroprevalence < 1 - test specificity                      |
| <a href="https://papers.ssrn.com/sol3/papers.cfm?abstract_id=3752659">https://papers.ssrn.com/sol3/papers.cfm?abstract_id=3752659</a>                                                       | Canada     | Duplicate                                                  |
| <a href="https://papers.ssrn.com/sol3/papers.cfm?abstract_id=3933650">https://papers.ssrn.com/sol3/papers.cfm?abstract_id=3933650</a>                                                       | Chile      | Several sampled (sub)regions not representative of country |
| <a href="https://dx.doi.org/10.1016/j.lanwpc.2021.100094">https://dx.doi.org/10.1016/j.lanwpc.2021.100094</a>                                                                               | China      | Several sampled (sub)regions not representative of country |
| <a href="https://dx.doi.org/10.1007/s10654-021-00796-8">https://dx.doi.org/10.1007/s10654-021-00796-8</a>                                                                                   | Denmark    | Duplicate                                                  |
| <a href="https://dx.doi.org/10.1007/s10654-021-00796-8">https://dx.doi.org/10.1007/s10654-021-00796-8</a>                                                                                   | Denmark    | Duplicate                                                  |
| <a href="https://dx.doi.org/10.1007/s10654-021-00796-8">https://dx.doi.org/10.1007/s10654-021-00796-8</a>                                                                                   | Denmark    | Duplicate                                                  |
| <a href="https://doi.org/10.1101/2021.05.07.21256725">https://doi.org/10.1101/2021.05.07.21256725</a>                                                                                       | Denmark    | Not general population sample                              |
| <a href="https://www.medrxiv.org/content/10.1101/2021.08.10.21261777v1">https://www.medrxiv.org/content/10.1101/2021.08.10.21261777v1</a>                                                   | Denmark    | Seroprevalence < 1 - test specificity                      |
| <a href="https://dx.doi.org/10.1371/journal.ppat.1009413">https://dx.doi.org/10.1371/journal.ppat.1009413</a>                                                                               | Egypt      | Several sampled (sub)regions not representative of country |
| <a href="https://ut.ee/et/sisu/koroonaviiruselevimuse-seireuringu-antikehade-analuusi-tulemused">https://ut.ee/et/sisu/koroonaviiruselevimuse-seireuringu-antikehade-analuusi-tulemused</a> | Estonia    | News article                                               |
| <a href="http://dx.doi.org/10.1016/j.ijid.2021.08.028">http://dx.doi.org/10.1016/j.ijid.2021.08.028</a>                                                                                     | Ethiopia   | Several sampled (sub)regions not representative of country |
| <a href="https://dx.doi.org/10.1186/s12879-021-06973-0">https://dx.doi.org/10.1186/s12879-021-06973-0</a>                                                                                   | France     | Duplicate of included study                                |
| <a href="https://www.medrxiv.org/content/10.1101/2021.10.25.21265456v1.full-text">https://www.medrxiv.org/content/10.1101/2021.10.25.21265456v1.full-text</a>                               | France     | Duplicate (preprint of full paper)                         |
| <a href="https://drees.solidarites-sante.gouv.fr/sites/default/files/2021-01/er1167-en.pdf">https://drees.solidarites-sante.gouv.fr/sites/default/files/2021-01/er1167-en.pdf</a>           | France     | Duplicate (preprint of full paper)                         |
| <a href="https://dx.doi.org/10.1016/j.idnow.2020.12.007">https://dx.doi.org/10.1016/j.idnow.2020.12.007</a>                                                                                 | France     | Several sampled (sub)regions not representative of country |
| <a href="https://papers.ssrn.com/sol3/papers.cfm?abstract_id=3834300">https://papers.ssrn.com/sol3/papers.cfm?abstract_id=3834300</a>                                                       | Germany    | Several sampled (sub)regions not representative of country |
| <a href="https://www.ifo.de/en/publikationen/2020/monograph-authorship/die-deutschen-und-corona">https://www.ifo.de/en/publikationen/2020/monograph-authorship/die-deutschen-und-corona</a> | Germany    | Not general population sample                              |
| <a href="https://www.medrxiv.org/content/10.1101/2021.06.21.21259001v1.full-text">https://www.medrxiv.org/content/10.1101/2021.06.21.21259001v1.full-text</a>                               | Germany    | Not general population sample                              |

|                                                                                                                                                                                                                                                                                                                                                                                                                                                                                                                                                 |               |                                                            |
|-------------------------------------------------------------------------------------------------------------------------------------------------------------------------------------------------------------------------------------------------------------------------------------------------------------------------------------------------------------------------------------------------------------------------------------------------------------------------------------------------------------------------------------------------|---------------|------------------------------------------------------------|
| <a href="https://dx.doi.org/10.3390/vaccines9050504">https://dx.doi.org/10.3390/vaccines9050504</a>                                                                                                                                                                                                                                                                                                                                                                                                                                             | Greece        | Not general population sample:<br>Leftover samples         |
| <a href="https://revistas.ucr.ac.cr/index.php/psm/article/view/43261/46175">https://revistas.ucr.ac.cr/index.php/psm/article/view/43261/46175</a>                                                                                                                                                                                                                                                                                                                                                                                               | Honduras      | Municipalities with no reported cases                      |
| 10.1101/2021.03.19.21253429                                                                                                                                                                                                                                                                                                                                                                                                                                                                                                                     | India         | Several sampled (sub)regions not representative of country |
| <a href="https://dx.doi.org/10.1016/S2214-109X(20)30544-1">https://dx.doi.org/10.1016/S2214-109X(20)30544-1</a>                                                                                                                                                                                                                                                                                                                                                                                                                                 | India         | Duplicate                                                  |
| <a href="http://dx.doi.org/10.4103/ijmr.IJMR.3290_20">http://dx.doi.org/10.4103/ijmr.IJMR.3290_20</a>                                                                                                                                                                                                                                                                                                                                                                                                                                           | India         | Duplicate of included study                                |
| <a href="https://www.bbc.com/news/world-asia-india-55945382">https://www.bbc.com/news/world-asia-india-55945382</a>                                                                                                                                                                                                                                                                                                                                                                                                                             | India         | News article                                               |
| <a href="https://www.medrxiv.org/content/10.1101/2021.02.05.21251118v2">https://www.medrxiv.org/content/10.1101/2021.02.05.21251118v2</a>                                                                                                                                                                                                                                                                                                                                                                                                       | India         | Several sampled (sub)regions not representative of country |
| <a href="http://dx.doi.org/10.1016/S1473-3099%2820%2930858-6">http://dx.doi.org/10.1016/S1473-3099%2820%2930858-6</a>                                                                                                                                                                                                                                                                                                                                                                                                                           | Iran          | Several sampled (sub)regions not representative of country |
| <a href="http://dx.doi.org/10.1016/S1473-3099%2820%2930858-6">http://dx.doi.org/10.1016/S1473-3099%2820%2930858-6</a>                                                                                                                                                                                                                                                                                                                                                                                                                           | Iran          | Several sampled (sub)regions not representative of country |
| <a href="https://www.google.com/url?rct=j&amp;sa=t&amp;url=https://www.timesofisrael.com/initial-antibody-tests-indicate-200000-israelis-have-had-covid-19-report/&amp;ct=ga&amp;cd=CAAYBjlaOTBkZWE5ODk5NGU5MTg1OTpb206ZW46VVVM&amp;usg=AFQjCNHYeXqD2hiEiNnZoH5qLiVZKxQjg">https://www.google.com/url?rct=j&amp;sa=t&amp;url=https://www.timesofisrael.com/initial-antibody-tests-indicate-200000-israelis-have-had-covid-19-report/&amp;ct=ga&amp;cd=CAAYBjlaOTBkZWE5ODk5NGU5MTg1OTpb206ZW46VVVM&amp;usg=AFQjCNHYeXqD2hiEiNnZoH5qLiVZKxQjg</a> | Israel        | News article                                               |
| <a href="https://dx.doi.org/10.1128/Spectrum.00870-21">https://dx.doi.org/10.1128/Spectrum.00870-21</a>                                                                                                                                                                                                                                                                                                                                                                                                                                         | Israel        | Seroprevalence < 1 - test specificity                      |
| <a href="https://www.istat.it/it/files//2020/08/ReportPrimiRisultatiIndagineSiero.pdf">https://www.istat.it/it/files//2020/08/ReportPrimiRisultatiIndagineSiero.pdf</a>                                                                                                                                                                                                                                                                                                                                                                         | Italy         | Duplicate                                                  |
| <a href="http://dx.doi.org/10.1016/j.onehlt.2021.100292">http://dx.doi.org/10.1016/j.onehlt.2021.100292</a>                                                                                                                                                                                                                                                                                                                                                                                                                                     | Jordan        | Duplicate                                                  |
| <a href="http://dx.doi.org/10.1016/j.onehlt.2021.100292">http://dx.doi.org/10.1016/j.onehlt.2021.100292</a>                                                                                                                                                                                                                                                                                                                                                                                                                                     | Jordan        | Duplicate                                                  |
| <a href="https://dx.doi.org/10.3390/jcm9123989">https://dx.doi.org/10.3390/jcm9123989</a>                                                                                                                                                                                                                                                                                                                                                                                                                                                       | Liechtenstein | Not general population sample                              |
| <a href="https://www.medrxiv.org/content/10.1101/2020.05.11.20092916v1">https://www.medrxiv.org/content/10.1101/2020.05.11.20092916v1</a>                                                                                                                                                                                                                                                                                                                                                                                                       | Luxembourg    | Seroprevalence < 1 - test specificity                      |
| <a href="https://www.gob.mx/salud/prensa/255-secretaria-de-salud-presenta-resultados-preliminares-de-la-encuesta-nacional-de-salud-y-nutricion-covid-19?idiom=es">https://www.gob.mx/salud/prensa/255-secretaria-de-salud-presenta-resultados-preliminares-de-la-encuesta-nacional-de-salud-y-nutricion-covid-19?idiom=es</a>                                                                                                                                                                                                                   | Mexico        | News article                                               |
| <a href="https://saludpublica.mx/index.php/spm/article/view/12847">https://saludpublica.mx/index.php/spm/article/view/12847</a>                                                                                                                                                                                                                                                                                                                                                                                                                 | Mexico        | Not general population sample                              |
| <a href="https://saludpublica.mx/index.php/spm/article/view/12847">https://saludpublica.mx/index.php/spm/article/view/12847</a>                                                                                                                                                                                                                                                                                                                                                                                                                 | Mexico        | Duplicate                                                  |
| <a href="https://dx.doi.org/10.1136/jech-2020-215678">https://dx.doi.org/10.1136/jech-2020-215678</a>                                                                                                                                                                                                                                                                                                                                                                                                                                           | Netherlands   | Duplicate of included study                                |
| <a href="https://dx.doi.org/10.1016/j.ijid.2021.09.062">https://dx.doi.org/10.1016/j.ijid.2021.09.062</a>                                                                                                                                                                                                                                                                                                                                                                                                                                       | Oman          | Duplicate                                                  |

|                                                                                                                                                                                                                                                                                                                                                                                                                                                         |                                                      |                                                            |
|---------------------------------------------------------------------------------------------------------------------------------------------------------------------------------------------------------------------------------------------------------------------------------------------------------------------------------------------------------------------------------------------------------------------------------------------------------|------------------------------------------------------|------------------------------------------------------------|
| <a href="https://dx.doi.org/10.1016/j.ijid.2021.09.062">https://dx.doi.org/10.1016/j.ijid.2021.09.062</a>                                                                                                                                                                                                                                                                                                                                               | Oman                                                 | Duplicate                                                  |
| <a href="https://dx.doi.org/10.1016/j.ijid.2021.09.062">https://dx.doi.org/10.1016/j.ijid.2021.09.062</a>                                                                                                                                                                                                                                                                                                                                               | Oman                                                 | Duplicate                                                  |
| <a href="https://dx.doi.org/10.1007/s15010-021-01629-2">https://dx.doi.org/10.1007/s15010-021-01629-2</a>                                                                                                                                                                                                                                                                                                                                               | Pakistan                                             | Several sampled (sub)regions not representative of country |
| <a href="https://world.kbs.co.kr/service/newsview.htm?lang=e&amp;Seq_Code=157801">https://world.kbs.co.kr/service/newsview.htm?lang=e&amp;Seq_Code=157801</a>                                                                                                                                                                                                                                                                                           | Republic of Korea                                    | News article                                               |
| <a href="https://www.google.com/url?rct=j&amp;sa=t&amp;url=http://www.koreaherald.com/view.php%3Fud%3D20200709000787&amp;ct=ga&amp;cd=CAAYEDlaOTBkZWE5ODk5NGU5MTg1OTpjb206ZW46VV M&amp;usg=AFQjCNG8AlCeBcx2rR4FfgC726lI5TtgUw">https://www.google.com/url?rct=j&amp;sa=t&amp;url=http://www.koreaherald.com/view.php%3Fud%3D20200709000787&amp;ct=ga&amp;cd=CAAYEDlaOTBkZWE5ODk5NGU5MTg1OTpjb206ZW46VV M&amp;usg=AFQjCNG8AlCeBcx2rR4FfgC726lI5TtgUw</a> | Republic of Korea                                    | News article                                               |
| <a href="https://www.themoscowtimes.com/2020/06/10/1-in-7-russians-have-coronavirus-immunity-official-a70540">https://www.themoscowtimes.com/2020/06/10/1-in-7-russians-have-coronavirus-immunity-official-a70540</a> ;<br><a href="https://www.interfax.ru/russia/712617">https://www.interfax.ru/russia/712617</a>                                                                                                                                    | Russia                                               | News article                                               |
| <a href="https://www.medrxiv.org/content/10.1101/2021.01.28.21250598v1">https://www.medrxiv.org/content/10.1101/2021.01.28.21250598v1</a>                                                                                                                                                                                                                                                                                                               | Saudi Arabia                                         | Not general population sample                              |
| <a href="https://dx.doi.org/10.1016/j.cmi.2021.03.009">https://dx.doi.org/10.1016/j.cmi.2021.03.009</a>                                                                                                                                                                                                                                                                                                                                                 | Slovenia                                             | Duplicate                                                  |
| <a href="https://www.nicd.ac.za/wp-content/uploads/2021/03/COVID-19-Special-Public-Health-Surveillance-Bulletin-9-12-March-2021.pdf">https://www.nicd.ac.za/wp-content/uploads/2021/03/COVID-19-Special-Public-Health-Surveillance-Bulletin-9-12-March-2021.pdf</a>                                                                                                                                                                                     | South Africa                                         | Several sampled (sub)regions not representative of country |
| <a href="https://www.medrxiv.org/content/10.1101/2021.02.26.21252512v1">https://www.medrxiv.org/content/10.1101/2021.02.26.21252512v1</a>                                                                                                                                                                                                                                                                                                               | United Kingdom of Great Britain and Northern Ireland | Duplicate                                                  |
| <a href="https://www.medrxiv.org/content/10.1101/2021.02.26.21252512v1">https://www.medrxiv.org/content/10.1101/2021.02.26.21252512v1</a>                                                                                                                                                                                                                                                                                                               | United Kingdom of Great Britain and Northern Ireland | <90% by Jan 31, 2021                                       |
| <a href="https://www.ukbiobank.ac.uk/media/x0nd5sul/ukb_serologystudy_report_revised_6months_jan21.pdf">https://www.ukbiobank.ac.uk/media/x0nd5sul/ukb_serologystudy_report_revised_6months_jan21.pdf</a>                                                                                                                                                                                                                                               | United Kingdom of Great Britain and Northern Ireland | Not general population sample: Biobank                     |
| <a href="https://www.gov.uk/government/publications/national-covid-19-surveillance-reports">https://www.gov.uk/government/publications/national-covid-19-surveillance-reports</a>                                                                                                                                                                                                                                                                       | United Kingdom of Great Britain and Northern Ireland | Not general population sample                              |
| <a href="https://www.gov.uk/government/publications/national-covid-19-surveillance-reports">https://www.gov.uk/government/publications/national-covid-19-surveillance-reports</a>                                                                                                                                                                                                                                                                       | United Kingdom of Great Britain and Northern Ireland | Not general population sample                              |
| <a href="https://www.medrxiv.org/content/10.1101/2020.10.26.20219725v1.full.pdf">https://www.medrxiv.org/content/10.1101/2020.10.26.20219725v1.full.pdf</a>                                                                                                                                                                                                                                                                                             | United Kingdom of Great Britain and Northern Ireland | Duplicate (preprint of full paper)                         |
| <a href="https://www.medrxiv.org/content/10.1101/2020.10.26.20219725v1.full.pdf">https://www.medrxiv.org/content/10.1101/2020.10.26.20219725v1.full.pdf</a>                                                                                                                                                                                                                                                                                             | United Kingdom of Great Britain and Northern Ireland | Duplicate (preprint of full paper)                         |
| <a href="https://papers.ssrn.com/sol3/papers.cfm?abstract_id=3764198">https://papers.ssrn.com/sol3/papers.cfm?abstract_id=3764198</a>                                                                                                                                                                                                                                                                                                                   | United Kingdom of Great Britain and Northern Ireland | Not general population sample                              |
| <a href="https://papers.ssrn.com/sol3/papers.cfm?abstract_id=3764198">https://papers.ssrn.com/sol3/papers.cfm?abstract_id=3764198</a>                                                                                                                                                                                                                                                                                                                   | United Kingdom of Great Britain and Northern Ireland | Duplicate                                                  |



|                                                                                                                                                                                                                                                                                                                                                             |                                                      |                                                            |
|-------------------------------------------------------------------------------------------------------------------------------------------------------------------------------------------------------------------------------------------------------------------------------------------------------------------------------------------------------------|------------------------------------------------------|------------------------------------------------------------|
| <a href="https://papers.ssrn.com/sol3/papers.cfm?abstract_id=3764198">https://papers.ssrn.com/sol3/papers.cfm?abstract_id=3764198</a>                                                                                                                                                                                                                       | United Kingdom of Great Britain and Northern Ireland | Duplicate                                                  |
| <a href="https://www.gov.uk/government/publications/national-covid-19-surveillance-reports">https://www.gov.uk/government/publications/national-covid-19-surveillance-reports</a>                                                                                                                                                                           | United Kingdom of Great Britain and Northern Ireland | Seroprevalence < 1 - test specificity                      |
| <a href="https://dx.doi.org/10.1126/scitranslmed.abh3826">https://dx.doi.org/10.1126/scitranslmed.abh3826</a>                                                                                                                                                                                                                                               | United States of America                             | Duplicate                                                  |
| <a href="https://jamanetwork.com/journals/jamanetworkopen/fullarticle/2777502?utm_source=For%20The%20Media&amp;utm_medium=referral&amp;utm_campaign=ftm_links&amp;utm_term=031621">https://jamanetwork.com/journals/jamanetworkopen/fullarticle/2777502?utm_source=For The Media&amp;utm_medium=referral&amp;utm_campaign=ftm_links&amp;utm_term=031621</a> | United States of America                             | Not general population sample: Life insurance              |
| <a href="https://www.croiconference.org/abstract/us-population-based-survey-of-vaccine-willingness-and-sars-cov-2-antibody-prevalence/">https://www.croiconference.org/abstract/us-population-based-survey-of-vaccine-willingness-and-sars-cov-2-antibody-prevalence/</a>                                                                                   | United States of America                             | Meeting abstract                                           |
| <a href="https://dx.doi.org/10.1136/bmjopen-2021-048778">https://dx.doi.org/10.1136/bmjopen-2021-048778</a>                                                                                                                                                                                                                                                 | United States of America                             | Not general population sample                              |
| <a href="https://pubmed.ncbi.nlm.nih.gov/33532807/">https://pubmed.ncbi.nlm.nih.gov/33532807/</a>                                                                                                                                                                                                                                                           | United States of America                             | Duplicate (report of full paper)                           |
| <a href="https://dx.doi.org/10.1016/j.ejim.2021.01.029">https://dx.doi.org/10.1016/j.ejim.2021.01.029</a>                                                                                                                                                                                                                                                   | Vatican City                                         | Not general population sample                              |
| <a href="http://dx.doi.org/10.3390/ijerph18126353">http://dx.doi.org/10.3390/ijerph18126353</a>                                                                                                                                                                                                                                                             | Viet Nam                                             | Not general population sample: High-risk communities       |
| <a href="http://dx.doi.org/10.3390/ijerph18126353">http://dx.doi.org/10.3390/ijerph18126353</a>                                                                                                                                                                                                                                                             | Viet Nam                                             | Duplicate                                                  |
| <a href="http://dx.doi.org/10.3390/ijerph18126353">http://dx.doi.org/10.3390/ijerph18126353</a>                                                                                                                                                                                                                                                             | Viet Nam                                             | Duplicate                                                  |
| <a href="https://www.thelancet.com/journals/lanгло/article/PIIS2214-109X(21)00053-X/fulltext">https://www.thelancet.com/journals/lanгло/article/PIIS2214-109X(21)00053-X/fulltext</a>                                                                                                                                                                       | Zambia                                               | Several sampled (sub)regions not representative of country |
| <b>Search update</b>                                                                                                                                                                                                                                                                                                                                        |                                                      |                                                            |
| <a href="https://dx.doi.org/10.1001/jamanetworkopen.2021.46798">https://dx.doi.org/10.1001/jamanetworkopen.2021.46798</a>                                                                                                                                                                                                                                   | Canada                                               | Duplicate of included study                                |
| <a href="https://dx.doi.org/10.1186/s12879-022-07045-7">https://dx.doi.org/10.1186/s12879-022-07045-7</a>                                                                                                                                                                                                                                                   | Chile                                                | Several sampled (sub)regions not representative of country |
| <a href="https://doi.org/10.1038/s43856-022-00080-0">https://doi.org/10.1038/s43856-022-00080-0</a>                                                                                                                                                                                                                                                         | Czechia                                              | Overlapping with included study                            |
| <a href="https://dx.doi.org/10.1038/s41467-022-28232-9">https://dx.doi.org/10.1038/s41467-022-28232-9</a>                                                                                                                                                                                                                                                   | Mexico                                               | Duplicate of included study                                |
| <a href="https://dx.doi.org/10.2807/1560-7917.ES.2022.27.13.2100376">https://dx.doi.org/10.2807/1560-7917.ES.2022.27.13.2100376</a>                                                                                                                                                                                                                         | Norway                                               | Duplicate of included study                                |
| <a href="https://dx.doi.org/10.1016/j.jcv.2022.105130">https://dx.doi.org/10.1016/j.jcv.2022.105130</a>                                                                                                                                                                                                                                                     | Spain                                                | Duplicate of included study                                |
| <a href="https://dx.doi.org/10.1186/s12916-022-02286-4">https://dx.doi.org/10.1186/s12916-022-02286-4</a>                                                                                                                                                                                                                                                   | United Kingdom of Great Britain and Northern Ireland | Not general population sample                              |

**Supplementary Table 3:** Adjustments used in the adjusted seroprevalence estimates

| Country             | Adjustments made                                                                                                                                                                                          |
|---------------------|-----------------------------------------------------------------------------------------------------------------------------------------------------------------------------------------------------------|
| Afghanistan         | NA                                                                                                                                                                                                        |
| Andorra             | NA                                                                                                                                                                                                        |
| Canada              | NA                                                                                                                                                                                                        |
| Czech Republic      | NA                                                                                                                                                                                                        |
| Denmark             | Test sensitivity and specificity using the Rogan-Gladen estimator                                                                                                                                         |
| England             | Test performance, and weighted to account for sample design and for variation in response rate (age, sex, ethnicity, region and deprivation) to be representative of the England population over 18 years |
| Faroe Islands       | NA                                                                                                                                                                                                        |
| France (Warszewski) | Sample design, non-response, census calibration                                                                                                                                                           |
| France (Carrat)     | NA                                                                                                                                                                                                        |
| Germany             | Non-response, test performance and seroreversion                                                                                                                                                          |
| Hungary             | Design weighted. Response sample calibrated to known population counts by region, sex, and age categories.                                                                                                |
| Iceland             | NA                                                                                                                                                                                                        |
| India               | Cluster sampling, sensitivity, specificity                                                                                                                                                                |
| Iran                | Measurement error of the laboratory test, non-response bias and sampling design.                                                                                                                          |
| Ireland             | Weighted to adjust for varying response rates in age-sex strata                                                                                                                                           |
| Israel              | Age, sex, time period, RT-PCR status, municipal strata, sampling                                                                                                                                          |
| Italy               | Non-response, region, age, sex, working status, province                                                                                                                                                  |
| Japan               | NA                                                                                                                                                                                                        |
| Jersey              | NA                                                                                                                                                                                                        |
| Jordan              | NA                                                                                                                                                                                                        |
| Lao PDR             | Weighted for complex survey sample design, age and sex                                                                                                                                                    |
| Lebanon             | Sex, age and area of residence, test performance                                                                                                                                                          |

|                |                                                                                                                                                                                                                                                                                                                                                                                                                                                                                        |
|----------------|----------------------------------------------------------------------------------------------------------------------------------------------------------------------------------------------------------------------------------------------------------------------------------------------------------------------------------------------------------------------------------------------------------------------------------------------------------------------------------------|
| Lithuania      | NA                                                                                                                                                                                                                                                                                                                                                                                                                                                                                     |
| Maldives       | NA                                                                                                                                                                                                                                                                                                                                                                                                                                                                                     |
| Mexico         | Test performance, and used sampling weights to adjust for selection probabilities and non-response rates (with post-stratification on region, sex and age group)                                                                                                                                                                                                                                                                                                                       |
| Mongolia       | Test sensitivity and weighted prevalence rates according to age, sex, and provincial or district population size                                                                                                                                                                                                                                                                                                                                                                       |
| Nepal          | Survey design weights, age                                                                                                                                                                                                                                                                                                                                                                                                                                                             |
| Netherlands    | Adjusted for survey design, weighted to match the distribution of the general Dutch population (based on sex, age, ethnic background, and degree of urbanization) and controlled for test characteristics                                                                                                                                                                                                                                                                              |
| Norway         | Rake weighting for population estimates of seroprevalence by age, sex, place of birth and county based on individual-level data for the invited sample (participants and non-responders) together with the corresponding distributions from the source population, provided by the Norwegian Population Register. Applied propensity scores for nonresponse adjustment and jackknife replicate weights for the raking procedure. Estimates subsequently corrected for test performance |
| Oman           | Age group, sex, nationality                                                                                                                                                                                                                                                                                                                                                                                                                                                            |
| Pakistan       | NA                                                                                                                                                                                                                                                                                                                                                                                                                                                                                     |
| Portugal       | Adjusted for test performance, used sample weights and post-stratified by sex to adjust the seroprevalence extrapolating from the strata to the whole population                                                                                                                                                                                                                                                                                                                       |
| Russia         | NA                                                                                                                                                                                                                                                                                                                                                                                                                                                                                     |
| Senegal        | Weighted according to the age and sex distribution of the general population and adjusted test performance                                                                                                                                                                                                                                                                                                                                                                             |
| Slovenia       | NA                                                                                                                                                                                                                                                                                                                                                                                                                                                                                     |
| Spain          | Characteristics of the random subsample of the fourth round                                                                                                                                                                                                                                                                                                                                                                                                                            |
| USA (Sullivan) | Test performance, design weights                                                                                                                                                                                                                                                                                                                                                                                                                                                       |

|              |                                                                                                |
|--------------|------------------------------------------------------------------------------------------------|
| USA (Kalish) | Age, region, sex, urban/rural, race, Hispanic, BRFSS survey response, sensitivity, specificity |
|--------------|------------------------------------------------------------------------------------------------|

NA, not available

## Supplementary References

1. Saeedzai SA, Osmani A, Noormal B. Prevalence of COVID-19 and its related deaths in Afghanistan: a Nationwide, Population-Based Seroepidemiological Study. Islamic Republic of Afghanistan, Ministry of Public Health, Kabul, Afghanistan; 2020 July.
2. Royo-Cebrecos C, Vilanova D, López J, Arroyo V, Pons M, Francisco G, Carrasco MG, Piqué JM, Sanz S, Dobaño C, García-Basteiro AL. Mass SARS-CoV-2 serological screening, a population-based study in the Principality of Andorra. *Lancet Reg Health Eur*. 2021 May 21;5:100119. doi: 10.1016/j.lanepe.2021.100119. PMID: 34557824; PMCID: PMC8454851.
3. Tang X, Sharma A, Pasic M, Brown P, Colwill K, Gelband H, Birnboim HC, Nagelkerke N, Bogoch II, Bansal A, Newcombe L, Slater J, Rodriguez PS, Huang G, Fu SH, Meh C, Wu DC, Kaul R, Langlois MA, Morawski E, Hollander A, Eliopoulos D, Aloï B, Lam T, Abe KT, Rathod B, Fazel-Zarandi M, Wang J, Iskilova M, Pasculescu A, Caldwell L, Barrios-Rodiles M, Mohammed-Ali Z, Vas N, Santhanam DR, Cho ER, Qu K, Jha S, Jha V, Suraweera W, Malhotra V, Mastali K, Wen R, Sinha S, Reid A, Gingras AC, Chakraborty P, Slutsky AS, Jha P; Ab-C Study Investigators. Assessment of SARS-CoV-2 Seropositivity During the First and Second Viral Waves in 2020 and 2021 Among Canadian Adults. *JAMA Netw Open*. 2022 Feb 1;5(2):e2146798. doi: 10.1001/jamanetworkopen.2021.46798. PMID: 35171263; PMCID: PMC8851304.
4. Piler P, Thon V, Andrášková L, Doležel K, Kostka D, Pavlík T, Dušek L, Pikhart H, Bobák M, Matic S, Klánová J. Nationwide increases in anti-SARS-CoV-2 IgG antibodies between October 2020 and March 2021 in the unvaccinated Czech population. *Commun Med (Lond)*. 2022 Mar 1;2:19. doi: 10.1038/s43856-022-00080-0. PMID: 35603283; PMCID: PMC9053194.
5. Espenhain L, Tribler S, Sværke Jørgensen C, Holm Hansen C, Wolff Sönksen U, Ethelberg S. Prevalence of SARS-CoV-2 antibodies in Denmark: nationwide, population-based seroepidemiological study. *Eur J Epidemiol*. 2021 Jul;36(7):715-725. doi: 10.1007/s10654-021-00796-8. Epub 2021 Aug 22. PMID: 34420152; PMCID: PMC8380416.
6. Ward H, Cooke GS, Atchison C, Whitaker M, Elliott J, Moshe M, Brown JC, Flower B, Daunt A, Ainslie K, Ashby D, Donnelly CA, Riley S, Darzi A, Barclay W, Elliott P. Prevalence of antibody positivity to SARS-CoV-2 following the first peak of infection in England: Serial cross-sectional studies of 365,000 adults. *Lancet Reg Health Eur*. 2021 May;4:100098. doi: 10.1016/j.lanepe.2021.100098. Epub 2021 May 2. PMID: 33969335; PMCID: PMC8088780.

7. Petersen MS, Strøm M, Fjallsbak JP, Hansen JL, Larsen S, Eliassen EH, Johansen M, Veyhe AS, Kristiansen MF, Weihe P. Low Seroprevalence among Undetected COVID-19 Cases, Faroe Islands, November 2020. *Emerg Infect Dis.* 2022 Jan;28(1):242-244. doi: 10.3201/eid2801.210917. Epub 2021 Nov 10. PMID: 34757895; PMCID: PMC8714219.
8. Warszawski J, Meyer L, Franck JE, Rahib D, Lydié N, Gosselin A, Counil E, Kreling R, Novelli S, Slama R, Raynaud P, Bagein G, Costemalle V, Sillard P, Fourie T, de Lamballerie X, Bajos N; Epicov Team. Trends in social exposure to SARS-Cov-2 in France. Evidence from the national socio-epidemiological cohort-EPICOV. *PLoS One.* 2022 May 25;17(5):e0267725. doi: 10.1371/journal.pone.0267725. PMID: 35613100; PMCID: PMC9132278.
9. Carrat F, Lapidus N, Ninove L, Blanché H, Rahib D, Saba Villarroel PM, Touvier M, Severi G, Zins M, Deleuze JF, de Lamballerie X; SAPRIS-SERO study group. Age, COVID-19-like symptoms and SARS-CoV-2 seropositivity profiles after the first wave of the pandemic in France. *Infection.* 2022 Feb;50(1):257-262. doi: 10.1007/s15010-021-01731-5. Epub 2021 Nov 25. PMID: 34822130; PMCID: PMC8614216.
10. Neuhauser H, Rosario AS, Butschalowsky H, Haller S, Hoebel J, Michel J, Nitsche A, Poethko-Müller C, Prütz F, Schlaud M, Steinhauer HW. Germany's low SARS-CoV-2 seroprevalence confirms effective containment in 2020: Results of the nationwide RKI-SOEP study. *medRxiv.* 2021 Jan 1.
11. Merkely B, Szabó AJ, Kosztin A, Berényi E, Sebestyén A, Lengyel C, Merkely G, Karády J, Várkonyi I, Papp C, Miseta A, Betlehem J, Burián K, Csóka I, Vásárhelyi B, Ludwig E, Prinz G, Sinkó J, Hankó B, Varga P, Fülöp GÁ, Mag K, Vokó Z; HUNgarian CORonaVirus-19 Epidemiological Research (H-UNCOVER) investigators. Novel coronavirus epidemic in the Hungarian population, a cross-sectional nationwide survey to support the exit policy in Hungary. *Geroscience.* 2020 Aug;42(4):1063-1074. doi: 10.1007/s11357-020-00226-9. Epub 2020 Jul 17. PMID: 32677025; PMCID: PMC7366154.
12. Gudbjartsson DF, Norddahl GL, Melsted P, Gunnarsdottir K, Holm H, Eythorsson E, Arnthorsson AO, Helgason D, Bjarnadottir K, Ingvarsson RF, Thorsteinsdottir B, Kristjansdottir S, Birgisdottir K, Kristinsdottir AM, Sigurdsson MI, Arnadottir GA, Ivarsdottir EV, Andresdottir M, Jonsson F, Agustsdottir AB, Berglund J, Eiriksdottir B, Fridriksdottir R, Gardarsdottir EE, Gottfredsson M, Gretarsdottir OS, Gudmundsdottir S, Gudmundsson KR, Gunnarsdottir TR, Gylfason A, Helgason A, Jensson BO, Jonasdottir A, Jonsson H, Kristjansson T, Kristinsson KG,

Magnusdottir DN, Magnusson OT, Olafsdottir LB, Rognvaldsson S, le Roux L, Sigmundsdottir G, Sigurdsson A, Sveinbjornsson G, Sveinsdottir KE, Sveinsdottir M, Thorarensen EA, Thorbjornsson B, Thordardottir M, Saemundsdottir J, Kristjansson SH, Josefsdottir KS, Masson G, Georgsson G, Kristjansson M, Moller A, Palsson R, Gudnason T, Thorsteinsdottir U, Jonsdottir I, Sulem P, Stefansson K. Humoral Immune Response to SARS-CoV-2 in Iceland. *N Engl J Med*. 2020 Oct 29;383(18):1724-1734. doi: 10.1056/NEJMoa2026116. Epub 2020 Sep 1. PMID: 32871063; PMCID: PMC7494247.

13. Murhekar MV, Bhatnagar T, Thangaraj JWV, Saravanakumar V, Kumar MS, Selvaraju S, Rade K, Kumar CPG, Sabarinathan R, Turuk A, Asthana S, Balachandar R, Bangar SD, Bansal AK, Chopra V, Das D, Deb AK, Devi KR, Dhikav V, Dwivedi GR, Khan SMS, Kumar MS, Laxmaiah A, Madhukar M, Mahapatra A, Rangaraju C, Turuk J, Yadav R, Andhalkar R, Arunraj K, Bharadwaj DK, Bharti P, Bhattacharya D, Bhat J, Chahal AS, Chakraborty D, Chaudhury A, Deval H, Dhattrak S, Dayal R, Elantamilan D, Giridharan P, Haq I, Hudda RK, Jagjeevan B, Kalliath A, Kanungo S, Krishnan NN, Kshatri JS, Kumar A, Kumar N, Kumar VGV, Lakshmi GGJN, Mehta G, Mishra NK, Mitra A, Nagbhushanam K, Nimmathota A, Nirmala AR, Pandey AK, Prasad GV, Qurieshi MA, Reddy SD, Robinson A, Sahay S, Saxena R, Sekar K, Shukla VK, Singh HB, Singh PK, Singh P, Singh R, Srinivasan N, Varma DS, Viramgami A, Wilson VC, Yadav S, Yadav S, Zaman K, Chakrabarti A, Das A, Dhaliwal RS, Dutta S, Kant R, Khan AM, Narain K, Narasimhaiah S, Padmapriyadarshini C, Pandey K, Pati S, Patil S, Rajkumar H, Ramarao T, Sharma YK, Singh S, Panda S, Reddy DCS, Bhargava B; ICMR Serosurveillance Group. SARS-CoV-2 seroprevalence among the general population and healthcare workers in India, December 2020-January 2021. *Int J Infect Dis*. 2021 Jul;108:145-155. doi: 10.1016/j.ijid.2021.05.040. Epub 2021 May 19. PMID: 34022338; PMCID: PMC8132496.

14. Khalagi K, Gharibzadeh S, Khalili D, Mansournia MA, Mirab Samiee S, Aghamohamadi S, Mir-Mohammad-Ali Roodaki M, Hashemi SM, Tayeri K, Namdari Tabar H, Azadmanesh K, Tabrizi JS, Mohammad K, Hajipour F, Namaki S, Raeisi A, Ostovar A. Prevalence of COVID-19 in Iran: results of the first survey of the Iranian COVID-19 Serological Surveillance programme. *Clin Microbiol Infect*. 2021 Nov;27(11):1666-1671. doi: 10.1016/j.cmi.2021.06.002. Epub 2021 Jun 7. PMID: 34111585; PMCID: PMC8226066.

15. Heavey L, Garvey P, Colgan AM, Thornton L, Connell J, Roux T, Hunt M, O'Callaghan F, Culklin F, Keogan M, O'Connor N, O'Sullivan MB, O'Sullivan S, Tait M, De Gascun CF, Igoe D.

- The Study to Investigate COVID-19 Infection in People Living in Ireland (SCOPI): A seroprevalence study, June to July 2020. *Euro Surveill.* 2021 Dec;26(48):2001741. doi: 10.2807/1560-7917.ES.2021.26.48.2001741. PMID: 34857067; PMCID: PMC8641066.
16. Reicher S, Ratzon R, Ben-Sahar S, Hermoni-Alon S, Mossinson D, Shenhar Y, Friger M, Lustig Y, Alroy-Preis S, Anis E, Sadetzki S, Kaliner E. Nationwide seroprevalence of antibodies against SARS-CoV-2 in Israel. *Eur J Epidemiol.* 2021 Jul;36(7):727-734. doi: 10.1007/s10654-021-00749-1. Epub 2021 Apr 21. PMID: 33884542; PMCID: PMC8059683.
17. Sabbadini LL. Primi risultati dell'indagine di sieroprevalenza SARS-CoV-2. Roma, Istituto Nazionale di Statistica. 2020 Aug 3. Available from: <https://www.istat.it/it/files//2020/08/ReportPrimiRisultatiIndagineSiero.pdf>.
18. Yoshiyama T, Saito Y, Masuda K, Nakanishi Y, Kido Y, Uchimura K, Mitarai S, Suzuki T, Nakagama Y, Kubota H, Satomi M, Uchikoba S, Ohnishi M, Wakita T, Kato S, Kato K. Prevalence of SARS-CoV-2-Specific Antibodies, Japan, June 2020. *Emerg Infect Dis.* 2021. Feb;27(2):628-631. doi: 10.3201/eid2702.204088. PMID: 33496235; PMCID: PMC7853542.
19. Government of Jersey. SARS-CoV-2: Prevalence of antibodies in Jersey. St Helier, Statistics Jersey. 2020 May 5. Available from: <https://www.gov.je/SiteCollectionDocuments/Government%20and%20administration/R%20Prevalence%20of%20antibodies%202020508%20SJ.pdf>.
20. Bellizzi S, Alsawalha L, Sheikh Ali S, Sharkas G, Muthu N, Ghazo M, Hayajneh W, Profili MC, Obeidat NM. A three-phase population based sero-epidemiological study: Assessing the trend in prevalence of SARS-CoV-2 during COVID-19 pandemic in Jordan. *One Health.* 2021 Jul 10;13:100292. doi: 10.1016/j.onehlt.2021.100292. PMID: 34295958; PMCID: PMC8272624.
21. Virachith S, Pommelet V, Calvez E, Khounvisith V, Sayasone S, Kounnavong S, Maxay M, Xangsayarath P, Temmam S, Eloit M, Escriou N, Rose T, Vongphayloth K, Hübschen JM, Lacoste V, Somlor S, Phonekeo D, Brey PT, Black AP. Low seroprevalence of COVID-19 in Lao PDR, late 2020. *Lancet Reg Health West Pac.* 2021 Aug;13:100197. doi: 10.1016/j.lanwpc.2021.100197. Epub 2021 Jul 14. PMID: 34278365; PMCID: PMC8277598.
22. Hoballah A, El Haidari R, Siblany G, Abdel Sater F, Mansour S, Hassan H, Abou-Abbas L. SARS-CoV-2 antibody seroprevalence in Lebanon: findings from the first nationwide serosurvey. *BMC Infect Dis.* 2022 Jan 10;22(1):42. doi: 10.1186/s12879-022-07031-z. PMID: 35012464; PMCID: PMC8744021.



23. Šmigelskas K, Petrikonis K, Kasiulevičius V, Kalėdienė R, Jakaitienė A, Kaselienė S, Sauliūnė S, Beržanskytė A, Stankūnas M. SARS-CoV-2 Seroprevalence in Lithuania: Results of National Population Survey. *Acta Med Litu*. 2021;28(1):48-58. doi: 10.15388/Amed.2020.28.1.2. Epub 2021 Jan 18. PMID: 34393628; PMCID: PMC8311832.
24. Abdul-Raheem R, Moosa S, Waheed F, Aboobakuru M, Ahmed IN, Rafeeg FN, Saeed M. A sero-epidemiological study after two waves of the COVID-19 epidemic. *Asian Pac J Allergy Immunol*. 2021 Dec 26. doi: 10.12932/AP-040721-1177. Epub ahead of print. PMID: 34953474.
25. Basto-Abreu A, Carnalla M, Torres-Ibarra L, Romero-Martínez M, Martínez-Barnetche J, López-Martínez I, Aparicio-Antonio R, Shamah-Levy T, Alpuche-Aranda C, Rivera JA, Barrientos-Gutierrez T; ENSANUT-COVID collaborators. Nationally representative SARS-CoV-2 antibody prevalence estimates after the first epidemic wave in Mexico. *Nat Commun*. 2022 Feb 1;13(1):589. doi: 10.1038/s41467-022-28232-9. PMID: 35105873; PMCID: PMC8807586.
26. Chimeddorj B, Mandakh U, Le LV, Bayartsogt B, Deleg Z, Enebish O, Altanbayar O, Magvan B, Gantumur A, Byambaa O, Enebish G, Saindoo BE, Davaadorj M, Amgalanbaatar A, Enkhugs K, Munkhbayar U, Bayanjargal B, Badamsambuu T, Dashtseren M, Narmandakh Z, Togoo K, Boldbaatar EA, Bat-Erdene A, Mukhtar Y, Shagdarsuren OE, Ganbat M, Batjargal O, Bavuusuren B, Batchuluun B, Zulmunkh G, Byambatsogt G, Nyamdavaa K, Dalkh T, Boldbaatar D, Tseren T, Gantulga D, Damdinbazar O, Vanchin B, Subissi L, Bergeri I, Dambadarjaa D, Pagbajabyn N, Greif G, Erkhembayar R. SARS-CoV-2 seroprevalence in Mongolia: Results from a national population survey. *Lancet Reg Health West Pac*. 2021 Dec;17:100317. doi: 10.1016/j.lanwpc.2021.100317. Epub 2021 Nov 23. PMID: 34841381; PMCID: PMC8609908.
27. Government of Nepal. Enhanced surveillance on sero-prevalence of SARS-CoV-2 in general population. Kathmandu, Government of Nepal Ministry of Health and Population. 2021 Apr 4. Available from: [https://mohp.gov.np/attachments/article/708/First%20Sero-prevalence\\_final\\_report\\_04-04-2021.pdf](https://mohp.gov.np/attachments/article/708/First%20Sero-prevalence_final_report_04-04-2021.pdf).
28. Vos ERA, van Boven M, den Hartog G, Backer JA, Klinkenberg D, van Hagen CCE, Boshuizen H, van Binnendijk RS, Mollema L, van der Klis FRM, de Melker HE. Associations Between Measures of Social Distancing and Severe Acute Respiratory Syndrome Coronavirus 2 Seropositivity: A Nationwide Population-based Study in the Netherlands. *Clin Infect Dis*. 2021 Dec 16;73(12):2318-2321. doi: 10.1093/cid/ciab264. PMID: 33772265; PMCID: PMC8083720.

29. Anda EE, Braaten T, Borch KB, Nøst TH, Chen SLF, Lukic M, Lund E, Forland F, Leon DA, Winje BA, Kran AB, Kalager M, Johansen FL, Sandanger TM. Seroprevalence of antibodies against SARS-CoV-2 in the adult population during the pre-vaccination period, Norway, winter 2020/21. *Euro Surveill.* 2022 Mar;27(13):2100376. doi: 10.2807/1560-7917.ES.2022.27.13.2100376. PMID: 35362405; PMCID: PMC8973017.
30. Al-Abri SS, Al-Wahaibi A, Al-Kindi H, Kurup PJ, Al-Maqbali A, Al-Mayahi Z, Al-Tobi MH, Al-Katheri SH, Albusaidi S, Al-Sukaiti MH, Al Balushi AYM, Abdelgadir IO, Al-Shehi N, Morkos E, Al-Maani A, Al-Rawahi B, Alyaquobi F, Alqayoudhi A, Al-Harthy K, Al-Khalili S, Al-Rashdi A, Al-Shukri I, Al Ghafri TS, Al-Hashmi F, Al Jassasi SM, Alshaqsi N, Mitra N, Al Aamry HS, Shah P, Al Marbouai HH, Al Araimi AH, Kair IM, Al Manji AM, Almallak AS, Al Alawi FK, Vaidya V, Muqetullah M, Alrashdi H, Al Jamoudi SSN, Alshaqsi A, Al Sharji A, Al Shukeiri H, Al-Abri B, Al-Rawahi S, Al-Lamki SH, Al-Manji A, Al-Jardani A. Seroprevalence of SARS-CoV-2 antibodies in the general population of Oman: results from four successive nationwide sero-epidemiological surveys. *Int J Infect Dis.* 2021 Nov;112:269-277. doi: 10.1016/j.ijid.2021.09.062. Epub 2021 Sep 30. PMID: 34601146; PMCID: PMC8482550.
31. Ahmad AM, Shahzad K, Masood M, Umar M, Abbasi F, Hafeez A. COVID-19 seroprevalence in Pakistan: a cross-sectional study. *BMJ Open.* 2022 Apr 6;12(4):e055381. doi: 10.1136/bmjopen-2021-055381. PMID: 35387815; PMCID: PMC8987211.
32. Canto E Castro L, Gomes A, Serrano M, Pereira AHG, Ribeiro R, Napoleão P, Domingues I, Silva C, Fanczal J, Afonso Â, Lopes A, Toader I, de Sousa MJR, de Sousa JGR, de Sousa G, Mota MM, Silva-Santos B, Veldhoen M, Ribeiro RM. Longitudinal SARS-CoV-2 seroprevalence in Portugal and antibody maintenance 12 months after infection. *Eur J Immunol.* 2022 Jan;52(1):149-160. doi: 10.1002/eji.202149619. Epub 2021 Nov 10. PMID: 34695227; PMCID: PMC8646574.
33. Popova AY, Smirnov VS, Andreeva EE, Babura EA, Balakhonov SV, Bashketova NS, Bugorkova SA, Bulanov MV, Valeullina NN, Vetrov VV, Goryaev DV, Detkovskaya TN, Ezhlova EB, Zaitseva NN, Istorik OA, Kovalchuk IV, Kozlovskikh DN, Kombarova SY, Kurganova OP, Lomovtsev AE, Lukicheva LA, Lyalina LV, Melnikova AA, Mikailova OM, Noskov AK, Noskova LN, Oglezneva EE, Osmolovskaya TP, Patyashina MA, Penkovskaya NA, Samoiloa LV, Stepanova TF, Trotsenko OE, Totolian AA. SARS-CoV-2 Seroprevalence Structure of the Russian Population during the COVID-19 Pandemic. *Viruses.* 2021 Aug 19;13(8):1648. doi: 10.3390/v13081648. PMID: 34452512; PMCID: PMC8402751.

34. Talla C, Loucoubar C, Roka JL, Barry MA, Ndiaye S, Diarra M, Thiam MS, Faye O, Dia M, Diop M, Ndiaye O. Seroprevalence of anti-SARS-CoV-2 antibodies in Senegal: a national population-based cross-sectional survey, between October and November 2020. *IJID Regions*. 2022 Jun 1;3:117-25.
35. Poljak M, Oštrbenk Valenčak A, Štrumbelj E, Maver Vodičar P, Vehovar V, Resman Rus K, Korva M, Knap N, Seme K, Petrovec M, Zupan B, Demšar J, Kurdija S, Avšič Županc T. Seroprevalence of severe acute respiratory syndrome coronavirus 2 in Slovenia: results of two rounds of a nationwide population study on a probability-based sample, challenges and lessons learned. *Clin Microbiol Infect*. 2021 Jul;27(7):1039.e1-1039.e7. doi: 10.1016/j.cmi.2021.03.009. Epub 2021 Apr 7. PMID: 33838303; PMCID: PMC8064903.
36. Gobierno de España. Estudio ENE-COVID: Cuarta ronda: Estudio nacional de sero-epidemiología de la infección por SARS-CoV-2 en España. Madrid, Gobierno de España Ministerio de Ciencia y Innovación. 2020 Dec 15. Available from: <https://www.sanidad.gob.es/gabinetePrensa/notaPrensa/pdf/15.12151220163348113.pdf>
37. Sullivan PS, Siegler AJ, Shioda K, Hall EW, Bradley H, Sanchez T, Luisi N, Valentine-Graves M, Nelson KN, Fahimi M, Kamali A, Sailey C, Lopman BA. Severe Acute Respiratory Syndrome Coronavirus 2 Cumulative Incidence, United States, August 2020-December 2020. *Clin Infect Dis*. 2022 Apr 9;74(7):1141-1150. doi: 10.1093/cid/ciab626. PMID: 34245245; PMCID: PMC8406864.
38. Kalish H, Klumpp-Thomas C, Hunsberger S, Baus HA, Fay MP, Siripong N, Wang J, Hicks J, Mehalko J, Travers J, Drew M, Pauly K, Spathies J, Ngo T, Adusei KM, Karkanitsa M, Croker JA, Li Y, Graubard BI, Czajkowski L, Belliveau O, Chairez C, Snead KR, Frank P, Shunmugavel A, Han A, Giurgea LT, Rosas LA, Bean R, Athota R, Cervantes-Medina A, Gouzoulis M, Heffelfinger B, Valenti S, Caldararo R, Kolberg MM, Kelly A, Simon R, Shafiq S, Wall V, Reed S, Ford EW, Lokwani R, Denson JP, Messing S, Michael SG, Gillette W, Kimberly RP, Reis SE, Hall MD, Esposito D, Memoli MJ, Sadtler K. Undiagnosed SARS-CoV-2 seropositivity during the first 6 months of the COVID-19 pandemic in the United States. *Sci Transl Med*. 2021 Jul 7;13(601):eabh3826. doi: 10.1126/scitranslmed.abh3826. Epub 2021 Jun 22. PMID: 34158410; PMCID: PMC8432952.

### Identification of studies via SeroTracker

### Identification of studies via database

Identification

Screening

Included

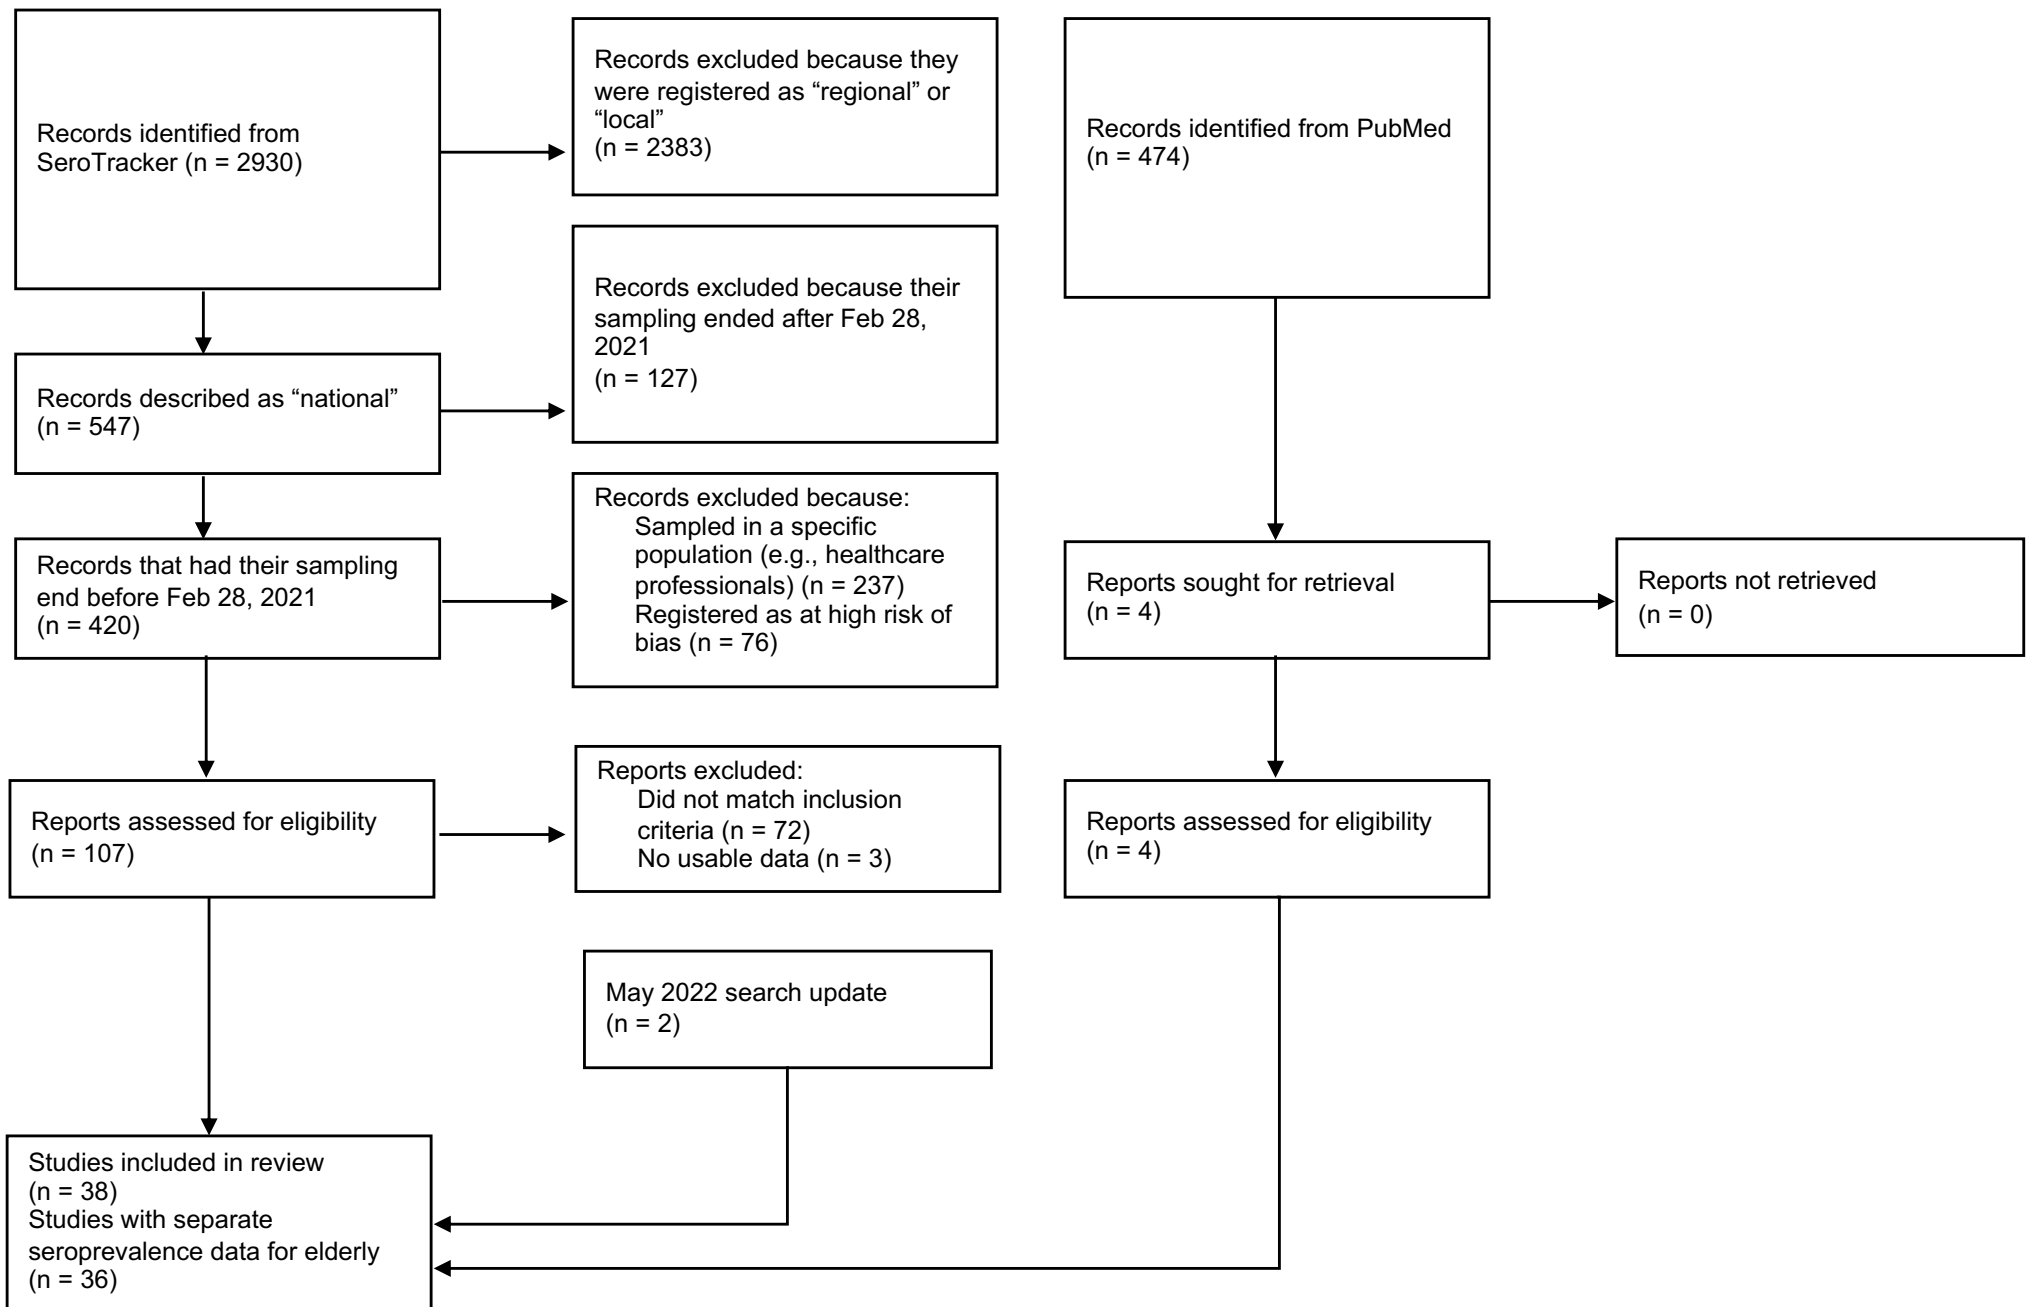

# Seroprevalence Elderly vs Non Elderly

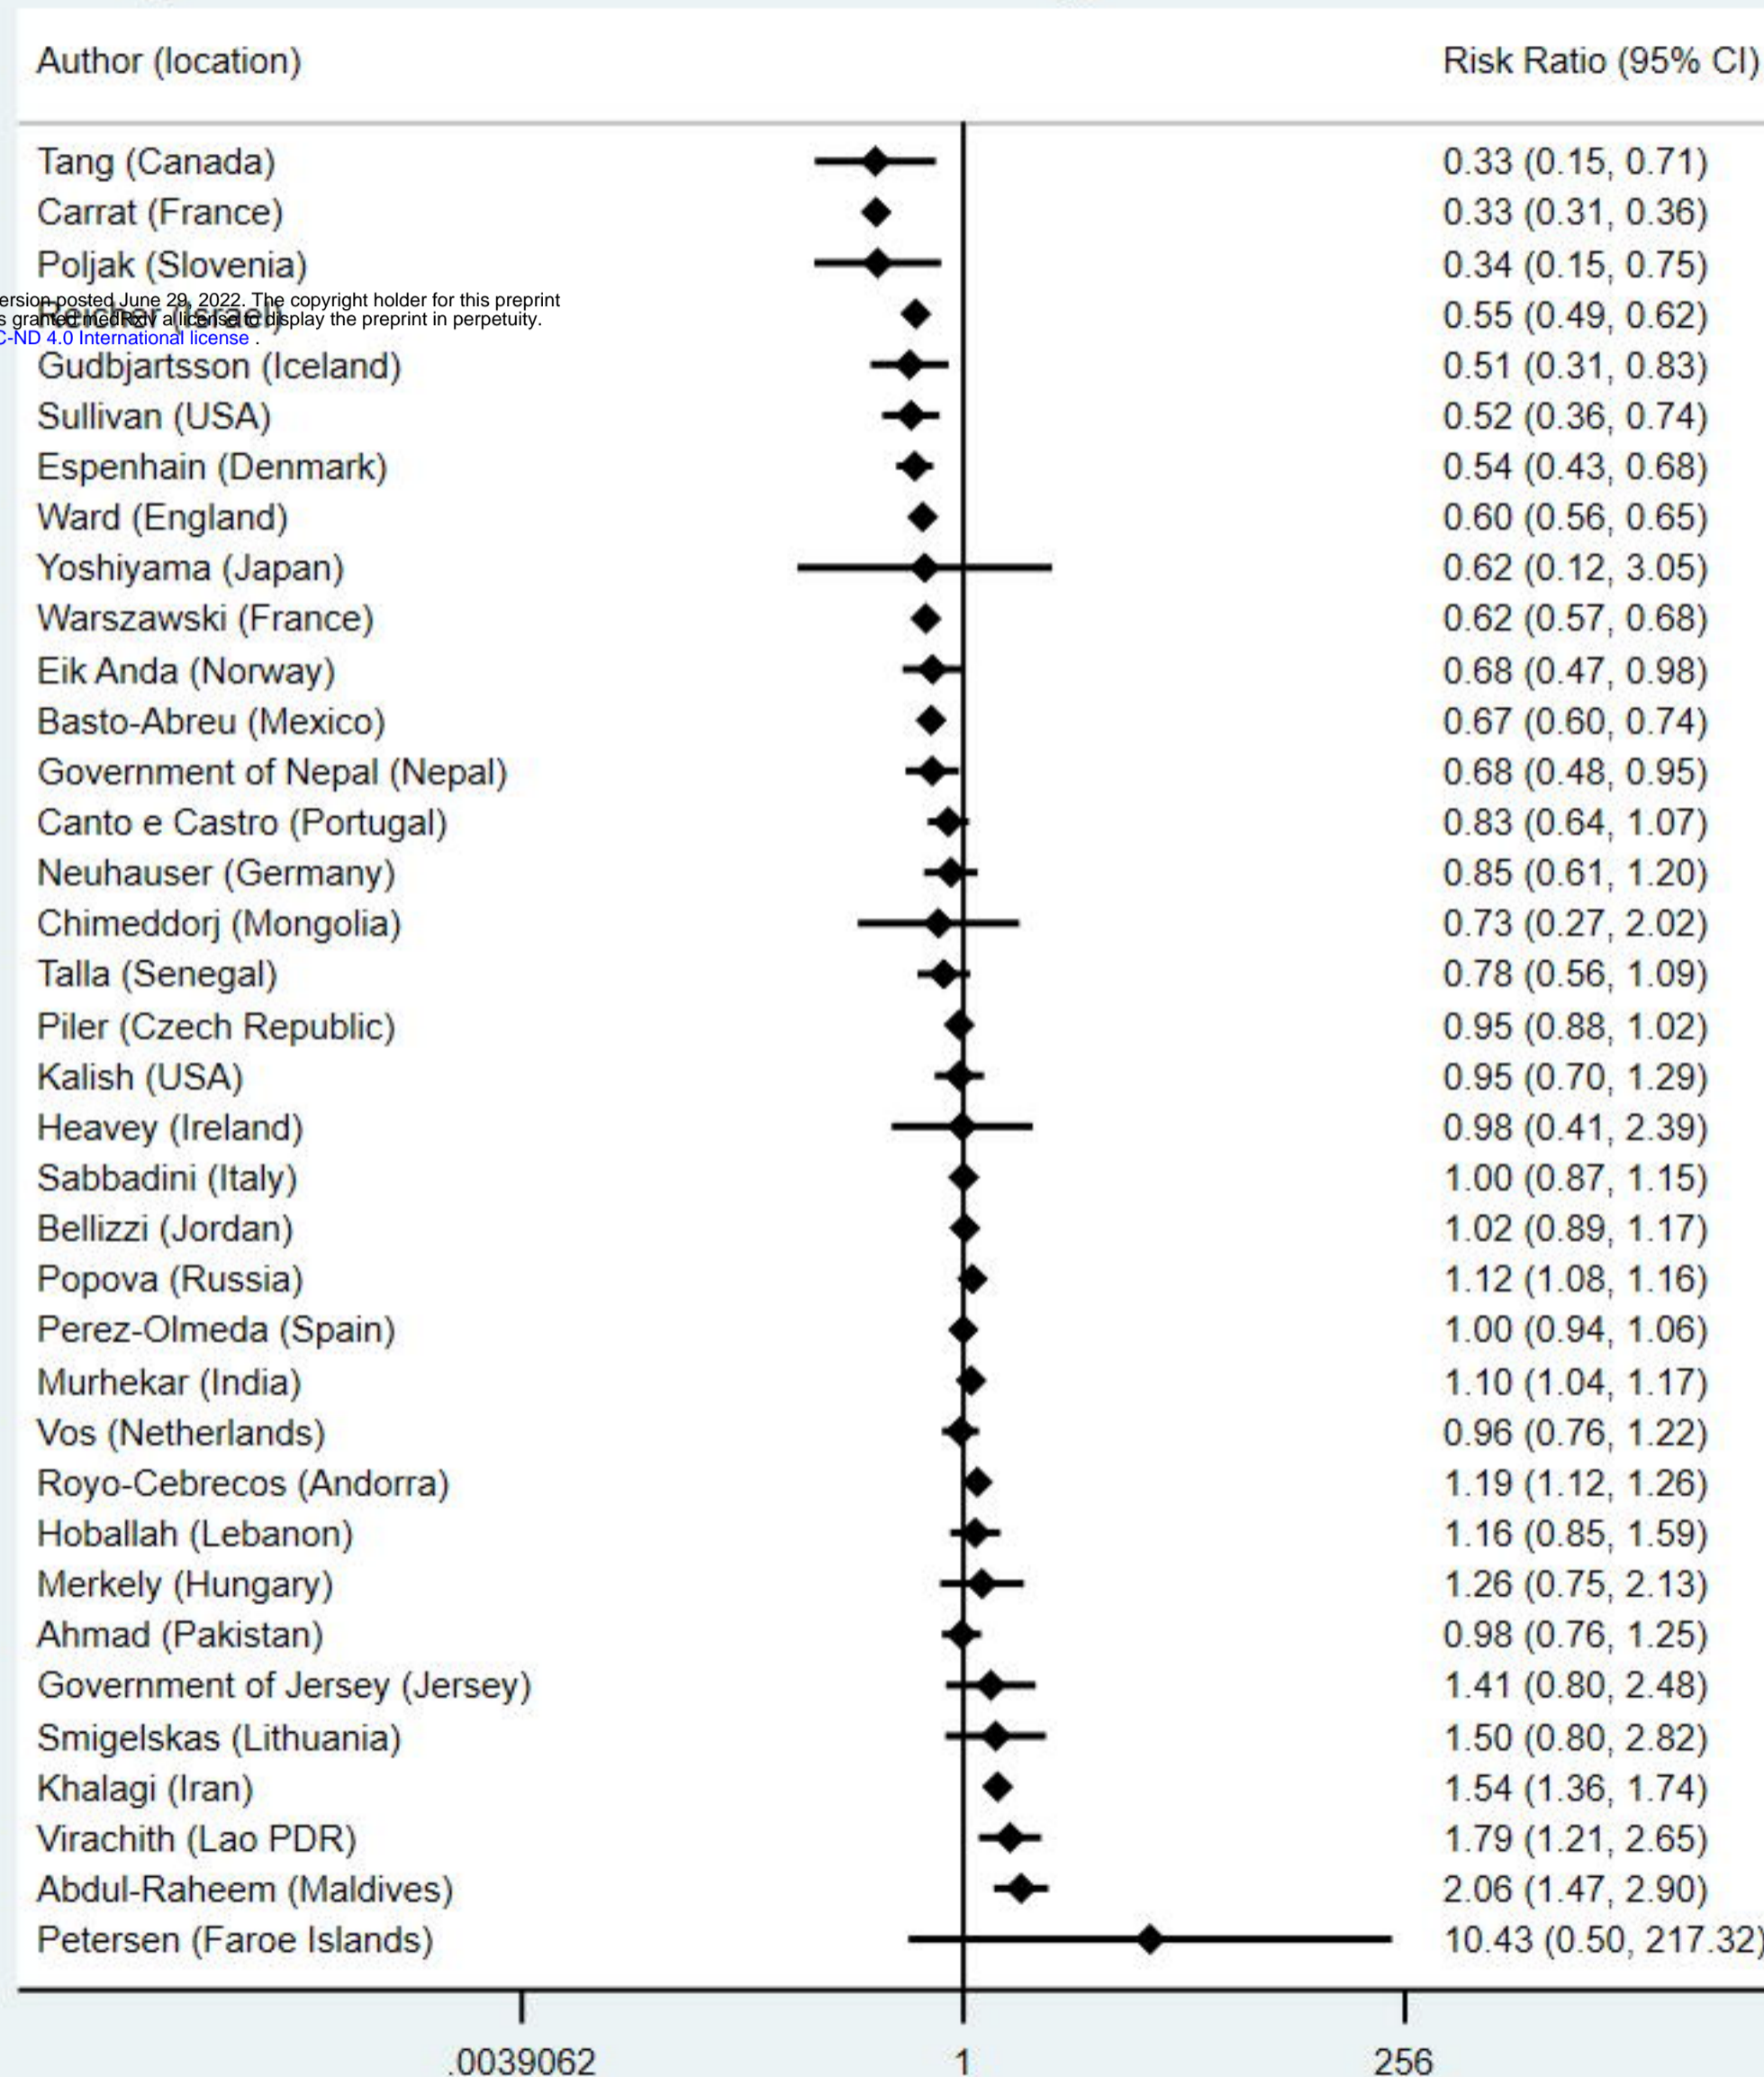

medRxiv preprint doi: <https://doi.org/10.1101/2022.06.28.22277034>; this version posted June 29, 2022. The copyright holder for this preprint (which was not certified by peer review) is the author/funder, who has granted medRxiv a license to display the preprint in perpetuity. It is made available under a [CC-BY-NC-ND 4.0 International license](https://creativecommons.org/licenses/by-nc-nd/4.0/).

# Seroprevalence Children/Adolescents vs Non Elderly Adults

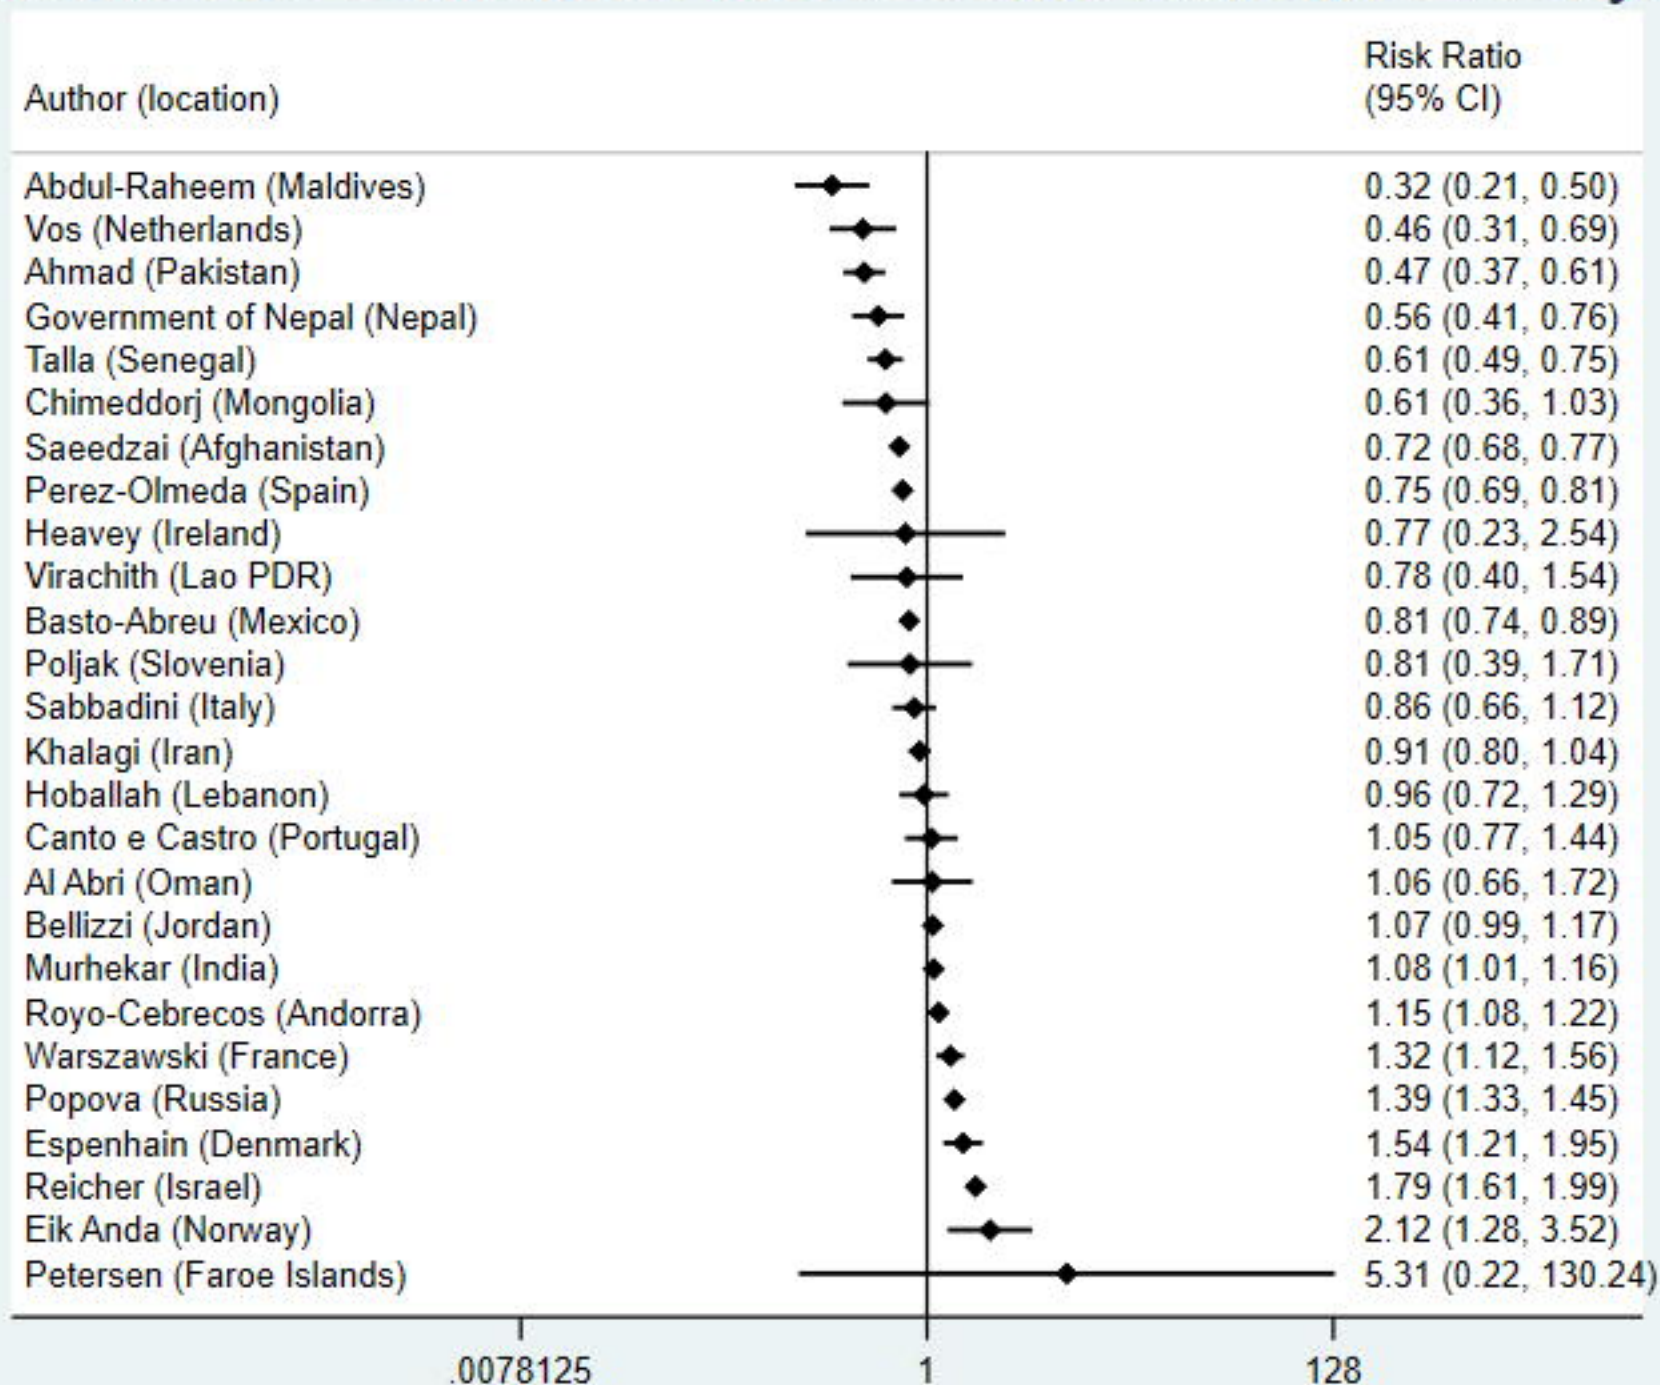

NOTE: Continuity correction applied to studies with zero cells
